# Supplementary material for: Photochemical rearrangement reactions of bicyclic molecules that contain a cyclopropane ring
Source: Royal Society of Chemistry journal article supplement (doi:10.1039/c8nj01795f), 2018-01-01
Supplement: c8nj01795f1.pdf [file c8nj01795f1.pdf]

# Supplementary Materials

## Photochemical Rearrangement Reactions of Bicyclic Molecules That Contain a Cyclopropane

Shih-Hao Su<sup>1</sup> and Ming-Der Su<sup>1,2\*</sup>

<sup>1</sup>Department of Applied Chemistry, National Chiayi University, Chiayi 60004,  
Taiwan

<sup>2</sup>Department of Medicinal and Applied Chemistry, Kaohsiung Medical  
University, Kaohsiung 80708, Taiwan

\*E-mail: midesu@mail.ncyu.edu.tw

### Table of Contents :

|                                  |     |
|----------------------------------|-----|
| <b>Theoretical Methods</b>       | S2  |
| <b>References</b>                | S2  |
| <b>Table S1 : [3,1,0]-TD-DFT</b> | S4  |
| <b>Table S2 : [5,1,0]-TD-DFT</b> | S13 |
| <b>Table S3 : [2,1,0]-TD-DFT</b> | S24 |
| <b>Table S4 : [4,1,0]-TD-DFT</b> | S38 |
| <b>Cartesian Coordinates</b>     | S43 |

Details of the present computational approach are as follows:

The geometries and energetics of the stationary points on the potential energy surface were calculated using the DFT (M06-L)<sup>1</sup> method in conjunction with the 6-311G(d,p) basis set.<sup>2</sup> We denote our M06-L calculations by M06-L/6-311G(d,p). The DFT calculations were executed using the Gaussian 09 software package.<sup>3</sup> Vibrational frequency calculations at the M06-L/6-311G(d,p) level were used to characterize all stationary points as either minima (the number of imaginary frequencies (NIMAG) = 0) or transition states (NIMAG = 1). Time-dependent density functional theory (TD-DFT) computations<sup>4,5</sup> were also performed with the same density functional and basis sets. Vertical excitations with 30 singlet and 30 triplet states were computed using ground state geometries to simulate the UV-vis spectra. The minimum energy crossing points between the singlet and triplet potential energy surfaces are also computed using the GAUSSIAN 09 package<sup>3</sup> and the code that was developed by Harvey et al.<sup>6</sup>. The Cartesian coordinates and the energies are given in the Supporting Information.

#### References:

- (1) Zhao, Y.; Truhlar, D. G. *Acc. Chem. Res.* **2008**, *41*, 157.
- (2) (a) Krishnan, R.; Binkley, J. S.; Seeger, R.; Pople, J. A. *J. Chem. Phys.* **1980**, *72*, 650. (b) McLean, A. D.; Chandler, G. S. *J. Chem. Phys.* **1980**, *72*, 5639. (c) Curtiss, L. A. M.; McGrath, P.; Blandeau, J-P.; Davis, N. E.; Binning, R. C.; Radom, Jr. L. *J. Chem. Phys.* **1995**, *103*, 6104.
- (3) Frisch, M. J.; Trucks, G. W.; Schlegel, H. B.; Scuseria, G. E.; Robb, M. A.; Cheeseman, J. R.; Zakrzewski, V. G.; Montgomery, Jr., J. A.; Stratmann, R. E.; Burant, J. C.; Dapprich, S.; Millam, J. M.; Daniels, A. D.; Kudin, K. N.; Strain, M. C.; Farkas, O.; Tomasi, J.; Barone, V.; Cossi, M.; Cammi, R.;

Mennucci, B.; Pomelli, C.; Adamo, C.; Clifford, S.; Ochterski, J.; Petersson, G. A.; Ayala, P. Y.; Cui, Q.; Morokuma, K.; Malick, D. K.; Rabuck, A. D.; Raghavachari, K.; Foresman, J. B.; Cioslowski, J.; Ortiz, J. V.; Baboul, A. G.; Stefanov, B. B.; Liu, Liashenko, G.; Piskorz, A.; Komaromi, P.; I.; Gomperts, R.; Martin, R. L.; Fox, D. J.; Keith, T.; Al-Laham, M. A.; Peng, C. Y.; Nanayakkara, A.; Gonzalez, C.; Challacombe, M.; Gill, P. M. W.; Johnson, B.; Chen, W.; Wong, M. W.; Andres, J. L.; Gonzalez, C.; Head-Gordon, M.; Replogle, E. S. and Pople, J. A. Gaussian, Inc., Wallingford CT, 2013.

- (4) Casida, M. E.; Jamorski, C.; Casida, K. C.; Salahub, D. R. *J. Chem. Phys.* **1998**, *109*, 8218.
- (5) Stratmann, R. E.; Scuseria, G. E.; Frisch, M. J. *J. Chem. Phys.* **1998**, *108*, 4439.
- (6) (a) Harvey, J. N.; Aschi, M.; Schwarz, H.; Koch, W. *Theor. Chem. Acc.* **1998**, *99*, 95. (b) Harvey, J. N.; Aschi, M. *Phys. Chem. Chem. Phys.* **1999**, *1*, 5555.

**Table S1.** The vertical excitation energies and oscillator strengths for the thirty lowest energy triplet excited states of molecule bicyclo[3,1,0]hex-3-en-2-one at the TD-DFT/M06-L/6-311G(d,p).

**[3,1,0]-TDDFT- Singlet**

|               |          |              |           |           |          |              |
|---------------|----------|--------------|-----------|-----------|----------|--------------|
| Excited State | 1:       | Singlet-?Sym | 3.5603 eV | 348.24 nm | f=0.0007 | <S**2>=0.000 |
|               | 25 -> 26 | 0.70667      |           |           |          |              |
| Excited State | 2:       | Singlet-?Sym | 4.9808 eV | 248.92 nm | f=0.0343 | <S**2>=0.000 |
|               | 22 -> 26 | -0.11453     |           |           |          |              |
|               | 23 -> 26 | 0.29392      |           |           |          |              |
|               | 24 -> 26 | 0.62663      |           |           |          |              |
| Excited State | 3:       | Singlet-?Sym | 5.9355 eV | 208.89 nm | f=0.1135 | <S**2>=0.000 |
|               | 22 -> 26 | 0.10232      |           |           |          |              |
|               | 23 -> 26 | 0.62356      |           |           |          |              |
|               | 24 -> 26 | -0.26471     |           |           |          |              |
| Excited State | 4:       | Singlet-?Sym | 6.3633 eV | 194.84 nm | f=0.0049 | <S**2>=0.000 |
|               | 25 -> 27 | 0.70004      |           |           |          |              |
| Excited State | 5:       | Singlet-?Sym | 7.0262 eV | 176.46 nm | f=0.0104 | <S**2>=0.000 |
|               | 21 -> 26 | -0.13752     |           |           |          |              |
|               | 22 -> 26 | -0.21322     |           |           |          |              |
|               | 25 -> 28 | 0.65260      |           |           |          |              |
| Excited State | 6:       | Singlet-?Sym | 7.0677 eV | 175.42 nm | f=0.0785 | <S**2>=0.000 |
|               | 22 -> 26 | 0.62377      |           |           |          |              |
|               | 24 -> 26 | 0.11094      |           |           |          |              |
|               | 25 -> 28 | 0.24559      |           |           |          |              |
| Excited State | 7:       | Singlet-?Sym | 7.1420 eV | 173.60 nm | f=0.0100 | <S**2>=0.000 |
|               | 21 -> 26 | 0.68444      |           |           |          |              |
|               | 25 -> 28 | 0.10671      |           |           |          |              |
| Excited State | 8:       | Singlet-?Sym | 7.5445 eV | 164.34 nm | f=0.0381 | <S**2>=0.000 |
|               | 20 -> 26 | 0.24000      |           |           |          |              |
|               | 24 -> 27 | 0.60684      |           |           |          |              |
|               | 24 -> 28 | -0.20968     |           |           |          |              |

|                   |              |           |           |          |              |
|-------------------|--------------|-----------|-----------|----------|--------------|
| Excited State 9:  | Singlet-?Sym | 7.7636 eV | 159.70 nm | f=0.0281 | <S**2>=0.000 |
| 25 -> 29          | 0.69210      |           |           |          |              |
| Excited State 10: | Singlet-?Sym | 7.8574 eV | 157.79 nm | f=0.0091 | <S**2>=0.000 |
| 25 -> 30          | 0.69623      |           |           |          |              |
| Excited State 11: | Singlet-?Sym | 7.8679 eV | 157.58 nm | f=0.0016 | <S**2>=0.000 |
| 19 -> 26          | -0.42739     |           |           |          |              |
| 20 -> 26          | 0.47370      |           |           |          |              |
| 24 -> 28          | 0.26936      |           |           |          |              |
| Excited State 12: | Singlet-?Sym | 7.9834 eV | 155.30 nm | f=0.0028 | <S**2>=0.000 |
| 19 -> 26          | 0.42192      |           |           |          |              |
| 23 -> 27          | -0.11730     |           |           |          |              |
| 24 -> 28          | 0.52376      |           |           |          |              |
| Excited State 13: | Singlet-?Sym | 8.3146 eV | 149.12 nm | f=0.0086 | <S**2>=0.000 |
| 19 -> 26          | -0.13695     |           |           |          |              |
| 20 -> 26          | -0.14741     |           |           |          |              |
| 23 -> 27          | 0.22098      |           |           |          |              |
| 24 -> 28          | 0.12430      |           |           |          |              |
| 25 -> 31          | 0.60278      |           |           |          |              |
| Excited State 14: | Singlet-?Sym | 8.3239 eV | 148.95 nm | f=0.0040 | <S**2>=0.000 |
| 18 -> 26          | 0.66341      |           |           |          |              |
| 23 -> 27          | -0.22368     |           |           |          |              |
| Excited State 15: | Singlet-?Sym | 8.4021 eV | 147.56 nm | f=0.0843 | <S**2>=0.000 |
| 18 -> 26          | 0.16797      |           |           |          |              |
| 19 -> 26          | -0.13028     |           |           |          |              |
| 20 -> 26          | -0.13780     |           |           |          |              |
| 23 -> 27          | 0.43688      |           |           |          |              |
| 24 -> 27          | 0.16186      |           |           |          |              |
| 24 -> 28          | 0.19154      |           |           |          |              |
| 25 -> 31          | -0.34733     |           |           |          |              |
| 25 -> 32          | -0.12888     |           |           |          |              |
| Excited State 16: | Singlet-?Sym | 8.5535 eV | 144.95 nm | f=0.0153 | <S**2>=0.000 |
| 20 -> 26          | 0.10960      |           |           |          |              |

|                   |              |           |           |          |              |  |
|-------------------|--------------|-----------|-----------|----------|--------------|--|
|                   | 23 -> 27     | 0.22940   |           |          |              |  |
|                   | 24 -> 29     | -0.28437  |           |          |              |  |
|                   | 25 -> 32     | 0.55452   |           |          |              |  |
| Excited State 17: | Singlet-?Sym | 8.5950 eV | 144.25 nm | f=0.0497 | <S**2>=0.000 |  |
|                   | 19 -> 26     | -0.14396  |           |          |              |  |
|                   | 20 -> 26     | -0.15268  |           |          |              |  |
|                   | 23 -> 27     | -0.14013  |           |          |              |  |
|                   | 24 -> 27     | 0.10148   |           |          |              |  |
|                   | 24 -> 29     | 0.41748   |           |          |              |  |
|                   | 24 -> 30     | -0.18287  |           |          |              |  |
|                   | 25 -> 32     | 0.40799   |           |          |              |  |
|                   | 25 -> 33     | 0.10984   |           |          |              |  |
| Excited State 18: | Singlet-?Sym | 8.5998 eV | 144.17 nm | f=0.0227 | <S**2>=0.000 |  |
|                   | 17 -> 26     | -0.12518  |           |          |              |  |
|                   | 19 -> 26     | 0.15162   |           |          |              |  |
|                   | 20 -> 26     | 0.19759   |           |          |              |  |
|                   | 23 -> 27     | 0.25426   |           |          |              |  |
|                   | 23 -> 28     | -0.13440  |           |          |              |  |
|                   | 24 -> 28     | -0.11897  |           |          |              |  |
|                   | 24 -> 29     | 0.48899   |           |          |              |  |
|                   | 24 -> 30     | 0.16409   |           |          |              |  |
|                   | 25 -> 33     | -0.12371  |           |          |              |  |
| Excited State 19: | Singlet-?Sym | 8.7826 eV | 141.17 nm | f=0.0070 | <S**2>=0.000 |  |
|                   | 17 -> 26     | 0.39320   |           |          |              |  |
|                   | 24 -> 30     | 0.56107   |           |          |              |  |
| Excited State 20: | Singlet-?Sym | 8.9029 eV | 139.26 nm | f=0.0152 | <S**2>=0.000 |  |
|                   | 17 -> 26     | -0.17633  |           |          |              |  |
|                   | 24 -> 30     | 0.10378   |           |          |              |  |
|                   | 25 -> 33     | 0.65337   |           |          |              |  |
| Excited State 21: | Singlet-?Sym | 8.9118 eV | 139.12 nm | f=0.0089 | <S**2>=0.000 |  |
|                   | 17 -> 26     | 0.52477   |           |          |              |  |
|                   | 19 -> 26     | 0.11040   |           |          |              |  |
|                   | 20 -> 26     | 0.14280   |           |          |              |  |
|                   | 22 -> 27     | 0.17772   |           |          |              |  |
|                   | 23 -> 28     | -0.13118  |           |          |              |  |

|                   |              |           |           |          |              |  |
|-------------------|--------------|-----------|-----------|----------|--------------|--|
|                   | 24 -> 27     | -0.11341  |           |          |              |  |
|                   | 24 -> 30     | -0.28093  |           |          |              |  |
|                   | 25 -> 33     | 0.13717   |           |          |              |  |
| Excited State 22: | Singlet-?Sym | 9.0430 eV | 137.11 nm | f=0.0446 | <S**2>=0.000 |  |
|                   | 23 -> 27     | 0.10407   |           |          |              |  |
|                   | 23 -> 28     | 0.62509   |           |          |              |  |
|                   | 25 -> 34     | -0.26187  |           |          |              |  |
| Excited State 23: | Singlet-?Sym | 9.2263 eV | 134.38 nm | f=0.0101 | <S**2>=0.000 |  |
|                   | 24 -> 31     | 0.69504   |           |          |              |  |
| Excited State 24: | Singlet-?Sym | 9.3407 eV | 132.74 nm | f=0.0544 | <S**2>=0.000 |  |
|                   | 23 -> 27     | 0.10429   |           |          |              |  |
|                   | 23 -> 28     | 0.19385   |           |          |              |  |
|                   | 24 -> 33     | -0.10951  |           |          |              |  |
|                   | 25 -> 34     | 0.62807   |           |          |              |  |
| Excited State 25: | Singlet-?Sym | 9.4806 eV | 130.78 nm | f=0.0223 | <S**2>=0.000 |  |
|                   | 22 -> 27     | -0.35126  |           |          |              |  |
|                   | 24 -> 32     | 0.58552   |           |          |              |  |
|                   | 24 -> 33     | -0.10035  |           |          |              |  |
| Excited State 26: | Singlet-?Sym | 9.4941 eV | 130.59 nm | f=0.0077 | <S**2>=0.000 |  |
|                   | 16 -> 26     | 0.47798   |           |          |              |  |
|                   | 22 -> 27     | 0.38817   |           |          |              |  |
|                   | 24 -> 32     | 0.31332   |           |          |              |  |
| Excited State 27: | Singlet-?Sym | 9.6995 eV | 127.83 nm | f=0.0186 | <S**2>=0.000 |  |
|                   | 23 -> 29     | 0.69173   |           |          |              |  |
| Excited State 28: | Singlet-?Sym | 9.7430 eV | 127.25 nm | f=0.0344 | <S**2>=0.000 |  |
|                   | 16 -> 26     | 0.45787   |           |          |              |  |
|                   | 20 -> 26     | 0.11059   |           |          |              |  |
|                   | 22 -> 27     | -0.34111  |           |          |              |  |
|                   | 22 -> 28     | 0.23295   |           |          |              |  |
|                   | 23 -> 29     | -0.10753  |           |          |              |  |
|                   | 24 -> 32     | -0.16115  |           |          |              |  |
| Excited State 29: | Singlet-?Sym | 9.8150 eV | 126.32 nm | f=0.0134 | <S**2>=0.000 |  |

23 -> 30            0.68775

Excited State 30:    Singlet-?Sym    9.9895 eV   124.11 nm   f=0.0526   <S\*\*2>=0.000  
21 -> 27            -0.27501  
22 -> 28            -0.26657  
24 -> 33            0.53485  
25 -> 35            0.13048

---

### [3,1,0]-TDDFT- Triplet

Excitation energies and oscillator strengths:

Excited State 1: 3.010-?Sym    0.5198 eV 2385.34 nm   f=0.0018   <S\*\*2>=2.015  
26A -> 27A            0.12264  
24B -> 25B            0.99609

Excited State 2: 3.010-?Sym    1.9230 eV   644.74 nm   f=0.0010   <S\*\*2>=2.016  
23B -> 25B            0.99405

Excited State 3: 3.011-?Sym    2.7710 eV   447.44 nm   f=0.0116   <S\*\*2>=2.016  
22B -> 25B            0.98295

Excited State 4: 3.004-?Sym    3.2578 eV   380.58 nm   f=0.0174   <S\*\*2>=2.006  
26A -> 27A            0.91959  
18B -> 25B            0.12718  
19B -> 25B            -0.12081  
21B -> 25B            -0.18956  
22B -> 25B            -0.11719  
24B -> 26B            0.24089

Excited State 5: 3.011-?Sym    3.4135 eV   346.92 nm   f=0.1050   <S\*\*2>=2.017  
26A -> 27A            0.16369  
20B -> 25B            0.11840  
21B -> 25B            0.96626

Excited State 6: 3.011-?Sym    3.9902 eV   310.72 nm   f=0.0002   <S\*\*2>=2.017  
18B -> 25B            -0.12993  
19B -> 25B            -0.33791  
20B -> 25B            0.90719  
21B -> 25B            -0.11536



|               |            |            |           |           |          |              |
|---------------|------------|------------|-----------|-----------|----------|--------------|
|               | 24B -> 26B | -0.13870   |           |           |          |              |
| Excited State | 7:         | 3.010-?Sym | 4.1518 eV | 298.63 nm | f=0.0010 | <S**2>=2.015 |
|               | 26A -> 28A | 0.96141    |           |           |          |              |
|               | 19B -> 25B | -0.11898   |           |           |          |              |
|               | 24B -> 26B | 0.21726    |           |           |          |              |
| Excited State | 8:         | 3.012-?Sym | 4.3399 eV | 285.68 nm | f=0.0046 | <S**2>=2.018 |
|               | 19B -> 25B | 0.89287    |           |           |          |              |
|               | 20B -> 25B | 0.36976    |           |           |          |              |
|               | 24B -> 26B | 0.19807    |           |           |          |              |
| Excited State | 9:         | 3.035-?Sym | 4.6031 eV | 269.35 nm | f=0.0024 | <S**2>=2.053 |
|               | 25A -> 27A | 0.13591    |           |           |          |              |
|               | 26A -> 27A | -0.12348   |           |           |          |              |
|               | 26A -> 28A | -0.15863   |           |           |          |              |
|               | 26A -> 29A | 0.10166    |           |           |          |              |
|               | 26A -> 30A | -0.10420   |           |           |          |              |
|               | 18B -> 25B | -0.61368   |           |           |          |              |
|               | 19B -> 25B | -0.13805   |           |           |          |              |
|               | 24B -> 26B | 0.71480    |           |           |          |              |
| Excited State | 10:        | 3.012-?Sym | 4.9611 eV | 249.91 nm | f=0.0071 | <S**2>=2.018 |
|               | 26A -> 29A | 0.89118    |           |           |          |              |
|               | 26A -> 30A | -0.19862   |           |           |          |              |
|               | 18B -> 25B | 0.34208    |           |           |          |              |
| Excited State | 11:        | 3.015-?Sym | 5.0692 eV | 244.58 nm | f=0.0167 | <S**2>=2.023 |
|               | 26A -> 27A | 0.11488    |           |           |          |              |
|               | 26A -> 29A | 0.39811    |           |           |          |              |
|               | 26A -> 30A | 0.74496    |           |           |          |              |
|               | 26A -> 31A | 0.12489    |           |           |          |              |
|               | 17B -> 25B | -0.19269   |           |           |          |              |
|               | 18B -> 25B | -0.37065   |           |           |          |              |
|               | 23B -> 26B | -0.11071   |           |           |          |              |
|               | 24B -> 26B | -0.20923   |           |           |          |              |
| Excited State | 12:        | 3.016-?Sym | 5.2129 eV | 237.84 nm | f=0.0283 | <S**2>=2.024 |
|               | 26A -> 27A | -0.14591   |           |           |          |              |
|               | 26A -> 28A | -0.11462   |           |           |          |              |

|            |          |
|------------|----------|
| 26A -> 29A | -0.15528 |
| 26A -> 30A | 0.59963  |
| 26A -> 31A | -0.25615 |
| 17B -> 25B | 0.46643  |
| 18B -> 25B | 0.35905  |
| 22B -> 26B | -0.10257 |
| 24B -> 26B | 0.33395  |

Excited State 13: 3.013-?Sym 5.3175 eV 233.16 nm f=0.0256 <S\*\*2>=2.020

|            |          |
|------------|----------|
| 26A -> 30A | -0.12406 |
| 26A -> 31A | 0.32179  |
| 26A -> 33A | 0.11164  |
| 17B -> 25B | 0.83463  |
| 18B -> 25B | -0.26189 |
| 19B -> 25B | 0.12129  |
| 23B -> 26B | -0.12452 |
| 24B -> 26B | -0.16727 |

Excited State 14: 3.020-?Sym 5.4443 eV 227.73 nm f=0.0260 <S\*\*2>=2.030

|            |          |
|------------|----------|
| 26A -> 31A | 0.88554  |
| 17B -> 25B | -0.12922 |
| 18B -> 25B | 0.21454  |
| 23B -> 26B | 0.23695  |
| 24B -> 26B | 0.20548  |

Excited State 15: 3.030-?Sym 5.7750 eV 214.69 nm f=0.0060 <S\*\*2>=2.046

|            |         |
|------------|---------|
| 25A -> 27A | 0.11059 |
| 26A -> 32A | 0.92941 |
| 16B -> 25B | 0.11189 |
| 22B -> 26B | 0.12989 |
| 23B -> 26B | 0.27355 |

Excited State 16: 3.024-?Sym 5.8575 eV 211.67 nm f=0.0053 <S\*\*2>=2.036

|            |          |
|------------|----------|
| 26A -> 33A | 0.89494  |
| 16B -> 25B | -0.32890 |
| 23B -> 26B | 0.26129  |

Excited State 17: 3.014-?Sym 5.9047 eV 209.97 nm f=0.0094 <S\*\*2>=2.021

|            |          |
|------------|----------|
| 26A -> 32A | -0.11719 |
| 26A -> 33A | 0.30383  |

|                   |            |           |           |          |              |  |
|-------------------|------------|-----------|-----------|----------|--------------|--|
|                   | 16B -> 25B | 0.92327   |           |          |              |  |
|                   | 23B -> 26B | 0.10580   |           |          |              |  |
| Excited State 18: | 3.159-?Sym | 6.3240 eV | 196.05 nm | f=0.0386 | <S**2>=2.245 |  |
|                   | 25A -> 27A | -0.26490  |           |          |              |  |
|                   | 26A -> 32A | -0.15179  |           |          |              |  |
|                   | 26A -> 33A | -0.14979  |           |          |              |  |
|                   | 26A -> 34A | -0.58375  |           |          |              |  |
|                   | 18B -> 25B | -0.13748  |           |          |              |  |
|                   | 22B -> 26B | -0.11054  |           |          |              |  |
|                   | 23B -> 26B | 0.64267   |           |          |              |  |
|                   | 24B -> 27B | 0.18803   |           |          |              |  |
|                   | 24B -> 28B | 0.12181   |           |          |              |  |
| Excited State 19: | 3.667-?Sym | 6.3635 eV | 194.84 nm | f=0.0081 | <S**2>=3.112 |  |
|                   | 25A -> 27A | -0.52563  |           |          |              |  |
|                   | 26A -> 32A | 0.12227   |           |          |              |  |
|                   | 26A -> 34A | 0.55632   |           |          |              |  |
|                   | 22B -> 26B | -0.20228  |           |          |              |  |
|                   | 24B -> 26B | 0.10398   |           |          |              |  |
|                   | 24B -> 27B | 0.47799   |           |          |              |  |
|                   | 24B -> 28B | 0.26137   |           |          |              |  |
| Excited State 20: | 3.133-?Sym | 6.4273 eV | 192.90 nm | f=0.0743 | <S**2>=2.204 |  |
|                   | 25A -> 27A | 0.21602   |           |          |              |  |
|                   | 26A -> 32A | -0.24174  |           |          |              |  |
|                   | 26A -> 33A | -0.18999  |           |          |              |  |
|                   | 26A -> 34A | 0.57502   |           |          |              |  |
|                   | 26A -> 35A | -0.11403  |           |          |              |  |
|                   | 18B -> 25B | -0.13936  |           |          |              |  |
|                   | 22B -> 26B | 0.26297   |           |          |              |  |
|                   | 23B -> 26B | 0.53761   |           |          |              |  |
|                   | 24B -> 26B | -0.17173  |           |          |              |  |
|                   | 24B -> 27B | -0.21717  |           |          |              |  |
| Excited State 21: | 3.137-?Sym | 6.9166 eV | 179.26 nm | f=0.0648 | <S**2>=2.210 |  |
|                   | 25A -> 27A | -0.24351  |           |          |              |  |
|                   | 26A -> 27A | -0.11203  |           |          |              |  |
|                   | 26A -> 34A | -0.10152  |           |          |              |  |
|                   | 22B -> 26B | 0.88447   |           |          |              |  |

|                   |            |           |           |          |              |  |
|-------------------|------------|-----------|-----------|----------|--------------|--|
|                   | 24B -> 27B | 0.22474   |           |          |              |  |
| Excited State 22: | 3.027-?Sym | 7.2735 eV | 170.46 nm | f=0.0006 | <S**2>=2.041 |  |
|                   | 25A -> 27A | 0.17409   |           |          |              |  |
|                   | 15B -> 25B | 0.94157   |           |          |              |  |
|                   | 24B -> 27B | 0.22334   |           |          |              |  |
| Excited State 23: | 3.314-?Sym | 7.3568 eV | 168.53 nm | f=0.0082 | <S**2>=2.495 |  |
|                   | 25A -> 27A | 0.31057   |           |          |              |  |
|                   | 26A -> 35A | -0.53372  |           |          |              |  |
|                   | 15B -> 25B | -0.18547  |           |          |              |  |
|                   | 24B -> 27B | 0.60835   |           |          |              |  |
|                   | 24B -> 28B | -0.43245  |           |          |              |  |
| Excited State 24: | 3.104-?Sym | 7.4074 eV | 167.38 nm | f=0.0257 | <S**2>=2.158 |  |
|                   | 25A -> 27A | 0.14609   |           |          |              |  |
|                   | 26A -> 35A | 0.69612   |           |          |              |  |
|                   | 15B -> 25B | -0.15833  |           |          |              |  |
|                   | 21B -> 26B | -0.54048  |           |          |              |  |
|                   | 24B -> 27B | 0.28027   |           |          |              |  |
|                   | 24B -> 28B | -0.25339  |           |          |              |  |
| Excited State 25: | 3.063-?Sym | 7.4308 eV | 166.85 nm | f=0.0390 | <S**2>=2.096 |  |
|                   | 26A -> 35A | 0.42958   |           |          |              |  |
|                   | 15B -> 25B | -0.16058  |           |          |              |  |
|                   | 21B -> 26B | 0.82331   |           |          |              |  |
|                   | 24B -> 27B | 0.18688   |           |          |              |  |
|                   | 24B -> 28B | -0.17385  |           |          |              |  |
| Excited State 26: | 3.402-?Sym | 7.7013 eV | 160.99 nm | f=0.0165 | <S**2>=2.644 |  |
|                   | 24A -> 27A | 0.70693   |           |          |              |  |
|                   | 25A -> 27A | -0.36759  |           |          |              |  |
|                   | 25A -> 28A | 0.29799   |           |          |              |  |
|                   | 26A -> 36A | 0.10102   |           |          |              |  |
|                   | 15B -> 25B | 0.10413   |           |          |              |  |
|                   | 24B -> 28B | -0.45214  |           |          |              |  |
| Excited State 27: | 3.338-?Sym | 7.8462 eV | 158.02 nm | f=0.0227 | <S**2>=2.536 |  |
|                   | 24A -> 27A | 0.59274   |           |          |              |  |
|                   | 25A -> 27A | 0.25046   |           |          |              |  |

|                   |                                                      |
|-------------------|------------------------------------------------------|
| 25A -> 28A        | -0.45194                                             |
| 26A -> 36A        | -0.27515                                             |
| 26A -> 37A        | 0.28730                                              |
| 20B -> 26B        | 0.19392                                              |
| 24B -> 27B        | 0.13589                                              |
| 24B -> 28B        | 0.35730                                              |
| <br>              |                                                      |
| Excited State 28: | 3.069-?Sym 7.9331 eV 156.29 nm f=0.0086 <S**2>=2.105 |
| 24A -> 27A        | 0.11811                                              |
| 25A -> 28A        | -0.26154                                             |
| 26A -> 36A        | 0.92763                                              |
| 24B -> 28B        | 0.10391                                              |
| <br>              |                                                      |
| Excited State 29: | 3.064-?Sym 7.9825 eV 155.32 nm f=0.0033 <S**2>=2.098 |
| 24A -> 27A        | -0.19940                                             |
| 25A -> 28A        | 0.25562                                              |
| 26A -> 36A        | 0.14512                                              |
| 26A -> 37A        | 0.90789                                              |
| <br>              |                                                      |
| Excited State 30: | 3.121-?Sym 8.0356 eV 154.29 nm f=0.0086 <S**2>=2.185 |
| 24A -> 27A        | 0.11951                                              |
| 25A -> 27A        | 0.14550                                              |
| 25A -> 28A        | 0.68318                                              |
| 26A -> 37A        | -0.19774                                             |
| 14B -> 25B        | 0.29390                                              |
| 19B -> 26B        | -0.12800                                             |
| 20B -> 26B        | 0.37638                                              |
| 24B -> 27B        | 0.11988                                              |
| 24B -> 28B        | 0.39174                                              |

---

**Table S2.** The vertical excitation energies and oscillator strengths for the thirty lowest energy triplet excited states of molecule bicyclo[5,1,0]octa-3,5-dien-2-one at the TD-DFT/M06-L/6-311G(d,p).

**[5,1,0]-TDDFT- Singlet**

Excitation energies and oscillator strengths:

|                  |                                                        |
|------------------|--------------------------------------------------------|
| Excited State 1: | Singlet-?Sym 2.6252 eV 472.28 nm f=0.0025 <S**2>=0.000 |
|------------------|--------------------------------------------------------|

|                  |              |           |           |          |              |  |
|------------------|--------------|-----------|-----------|----------|--------------|--|
|                  | 32 -> 33     | 0.69600   |           |          |              |  |
| Excited State 2: | Singlet-?Sym | 3.1640 eV | 391.86 nm | f=0.0055 | <S**2>=0.000 |  |
|                  | 31 -> 33     | 0.68998   |           |          |              |  |
|                  | 32 -> 34     | 0.10236   |           |          |              |  |
| Excited State 3: | Singlet-?Sym | 3.7690 eV | 328.96 nm | f=0.0161 | <S**2>=0.000 |  |
|                  | 31 -> 34     | 0.59012   |           |          |              |  |
|                  | 32 -> 34     | 0.36429   |           |          |              |  |
| Excited State 4: | Singlet-?Sym | 4.2558 eV | 291.33 nm | f=0.1253 | <S**2>=0.000 |  |
|                  | 30 -> 33     | -0.18613  |           |          |              |  |
|                  | 31 -> 34     | -0.33830  |           |          |              |  |
|                  | 31 -> 35     | 0.15532   |           |          |              |  |
|                  | 32 -> 34     | 0.51154   |           |          |              |  |
|                  | 32 -> 35     | -0.17929  |           |          |              |  |
| Excited State 5: | Singlet-?Sym | 4.3516 eV | 284.92 nm | f=0.0025 | <S**2>=0.000 |  |
|                  | 29 -> 33     | -0.12466  |           |          |              |  |
|                  | 30 -> 33     | 0.65247   |           |          |              |  |
|                  | 30 -> 34     | 0.11026   |           |          |              |  |
|                  | 32 -> 34     | 0.14488   |           |          |              |  |
|                  | 32 -> 35     | -0.12908  |           |          |              |  |
| Excited State 6: | Singlet-?Sym | 4.6648 eV | 265.79 nm | f=0.0284 | <S**2>=0.000 |  |
|                  | 29 -> 33     | -0.19407  |           |          |              |  |
|                  | 31 -> 34     | -0.15307  |           |          |              |  |
|                  | 31 -> 35     | 0.11865   |           |          |              |  |
|                  | 32 -> 34     | 0.13586   |           |          |              |  |
|                  | 32 -> 35     | 0.61937   |           |          |              |  |
| Excited State 7: | Singlet-?Sym | 5.1366 eV | 241.37 nm | f=0.0308 | <S**2>=0.000 |  |
|                  | 28 -> 33     | 0.10841   |           |          |              |  |
|                  | 31 -> 35     | 0.66679   |           |          |              |  |
|                  | 32 -> 34     | -0.14567  |           |          |              |  |
| Excited State 8: | Singlet-?Sym | 5.3640 eV | 231.14 nm | f=0.0179 | <S**2>=0.000 |  |
|                  | 28 -> 33     | 0.56814   |           |          |              |  |
|                  | 29 -> 33     | -0.27563  |           |          |              |  |
|                  | 30 -> 34     | -0.27086  |           |          |              |  |

|                   |              |           |           |          |              |
|-------------------|--------------|-----------|-----------|----------|--------------|
| Excited State 9:  | Singlet-?Sym | 5.5068 eV | 225.15 nm | f=0.0667 | <S**2>=0.000 |
| 28 -> 33          | 0.17639      |           |           |          |              |
| 29 -> 33          | -0.24349     |           |           |          |              |
| 30 -> 33          | -0.10554     |           |           |          |              |
| 30 -> 34          | 0.58315      |           |           |          |              |
| 30 -> 35          | 0.14984      |           |           |          |              |
| Excited State 10: | Singlet-?Sym | 5.5723 eV | 222.50 nm | f=0.0420 | <S**2>=0.000 |
| 28 -> 33          | 0.35832      |           |           |          |              |
| 29 -> 33          | 0.52269      |           |           |          |              |
| 29 -> 34          | -0.10362     |           |           |          |              |
| 30 -> 34          | 0.11760      |           |           |          |              |
| 32 -> 35          | 0.15699      |           |           |          |              |
| Excited State 11: | Singlet-?Sym | 6.0777 eV | 204.00 nm | f=0.0108 | <S**2>=0.000 |
| 28 -> 34          | -0.12765     |           |           |          |              |
| 29 -> 34          | 0.44730      |           |           |          |              |
| 32 -> 36          | 0.51077      |           |           |          |              |
| Excited State 12: | Singlet-?Sym | 6.1620 eV | 201.21 nm | f=0.0038 | <S**2>=0.000 |
| 28 -> 34          | 0.21264      |           |           |          |              |
| 29 -> 34          | 0.48922      |           |           |          |              |
| 30 -> 35          | 0.15521      |           |           |          |              |
| 32 -> 36          | -0.40839     |           |           |          |              |
| Excited State 13: | Singlet-?Sym | 6.2373 eV | 198.78 nm | f=0.0142 | <S**2>=0.000 |
| 28 -> 34          | 0.63955      |           |           |          |              |
| 29 -> 34          | -0.11202     |           |           |          |              |
| 32 -> 36          | 0.23063      |           |           |          |              |
| Excited State 14: | Singlet-?Sym | 6.3115 eV | 196.44 nm | f=0.0938 | <S**2>=0.000 |
| 28 -> 34          | -0.11848     |           |           |          |              |
| 29 -> 33          | 0.10277      |           |           |          |              |
| 29 -> 34          | -0.10902     |           |           |          |              |
| 30 -> 34          | -0.11226     |           |           |          |              |
| 30 -> 35          | 0.63922      |           |           |          |              |
| Excited State 15: | Singlet-?Sym | 6.6125 eV | 187.50 nm | f=0.0052 | <S**2>=0.000 |
| 27 -> 33          | 0.28192      |           |           |          |              |

|                   |              |           |           |          |              |  |
|-------------------|--------------|-----------|-----------|----------|--------------|--|
|                   | 32 -> 37     | 0.63923   |           |          |              |  |
| Excited State 16: | Singlet-?Sym | 6.6366 eV | 186.82 nm | f=0.0101 | <S**2>=0.000 |  |
|                   | 27 -> 33     | 0.61546   |           |          |              |  |
|                   | 29 -> 35     | 0.13515   |           |          |              |  |
|                   | 32 -> 37     | -0.28783  |           |          |              |  |
| Excited State 17: | Singlet-?Sym | 6.8010 eV | 182.30 nm | f=0.0060 | <S**2>=0.000 |  |
|                   | 31 -> 36     | 0.70129   |           |          |              |  |
| Excited State 18: | Singlet-?Sym | 6.8829 eV | 180.13 nm | f=0.0350 | <S**2>=0.000 |  |
|                   | 25 -> 33     | 0.12499   |           |          |              |  |
|                   | 26 -> 33     | 0.67797   |           |          |              |  |
| Excited State 19: | Singlet-?Sym | 7.2700 eV | 170.54 nm | f=0.0021 | <S**2>=0.000 |  |
|                   | 25 -> 33     | -0.31835  |           |          |              |  |
|                   | 27 -> 34     | 0.19238   |           |          |              |  |
|                   | 28 -> 35     | -0.30191  |           |          |              |  |
|                   | 29 -> 35     | 0.45164   |           |          |              |  |
|                   | 31 -> 37     | -0.10324  |           |          |              |  |
|                   | 32 -> 38     | 0.17608   |           |          |              |  |
| Excited State 20: | Singlet-?Sym | 7.3173 eV | 169.44 nm | f=0.0040 | <S**2>=0.000 |  |
|                   | 28 -> 35     | -0.19148  |           |          |              |  |
|                   | 31 -> 37     | 0.66591   |           |          |              |  |
|                   | 32 -> 38     | 0.10029   |           |          |              |  |
| Excited State 21: | Singlet-?Sym | 7.3308 eV | 169.13 nm | f=0.0054 | <S**2>=0.000 |  |
|                   | 27 -> 34     | 0.21007   |           |          |              |  |
|                   | 28 -> 35     | 0.29343   |           |          |              |  |
|                   | 29 -> 35     | -0.10729  |           |          |              |  |
|                   | 32 -> 38     | 0.59132   |           |          |              |  |
| Excited State 22: | Singlet-?Sym | 7.3419 eV | 168.87 nm | f=0.0071 | <S**2>=0.000 |  |
|                   | 25 -> 33     | -0.12217  |           |          |              |  |
|                   | 27 -> 34     | 0.59080   |           |          |              |  |
|                   | 28 -> 35     | 0.16124   |           |          |              |  |
|                   | 32 -> 38     | -0.30142  |           |          |              |  |
| Excited State 23: | Singlet-?Sym | 7.4456 eV | 166.52 nm | f=0.0284 | <S**2>=0.000 |  |



|                   |              |           |           |          |              |  |
|-------------------|--------------|-----------|-----------|----------|--------------|--|
|                   | 25 -> 33     | -0.28508  |           |          |              |  |
|                   | 27 -> 34     | -0.19726  |           |          |              |  |
|                   | 28 -> 35     | 0.47869   |           |          |              |  |
|                   | 29 -> 35     | 0.23340   |           |          |              |  |
|                   | 31 -> 37     | 0.18220   |           |          |              |  |
| Excited State 24: | Singlet-?Sym | 7.4872 eV | 165.60 nm | f=0.0269 | <S**2>=0.000 |  |
|                   | 25 -> 33     | 0.48992   |           |          |              |  |
|                   | 27 -> 34     | 0.11828   |           |          |              |  |
|                   | 27 -> 35     | -0.16267  |           |          |              |  |
|                   | 28 -> 35     | 0.12015   |           |          |              |  |
|                   | 29 -> 35     | 0.36983   |           |          |              |  |
|                   | 32 -> 39     | -0.10842  |           |          |              |  |
| Excited State 25: | Singlet-?Sym | 7.5868 eV | 163.42 nm | f=0.0056 | <S**2>=0.000 |  |
|                   | 26 -> 34     | 0.69689   |           |          |              |  |
| Excited State 26: | Singlet-?Sym | 7.6083 eV | 162.96 nm | f=0.0067 | <S**2>=0.000 |  |
|                   | 32 -> 39     | 0.68206   |           |          |              |  |
|                   | 32 -> 40     | -0.13768  |           |          |              |  |
| Excited State 27: | Singlet-?Sym | 7.6628 eV | 161.80 nm | f=0.0041 | <S**2>=0.000 |  |
|                   | 32 -> 39     | 0.13961   |           |          |              |  |
|                   | 32 -> 40     | 0.68415   |           |          |              |  |
| Excited State 28: | Singlet-?Sym | 7.7993 eV | 158.97 nm | f=0.0026 | <S**2>=0.000 |  |
|                   | 24 -> 33     | 0.60984   |           |          |              |  |
|                   | 25 -> 34     | 0.13227   |           |          |              |  |
|                   | 30 -> 36     | 0.26937   |           |          |              |  |
|                   | 32 -> 41     | -0.15275  |           |          |              |  |
| Excited State 29: | Singlet-?Sym | 7.8617 eV | 157.71 nm | f=0.0074 | <S**2>=0.000 |  |
|                   | 24 -> 33     | -0.22682  |           |          |              |  |
|                   | 25 -> 34     | -0.13548  |           |          |              |  |
|                   | 30 -> 36     | 0.64449   |           |          |              |  |
| Excited State 30: | Singlet-?Sym | 7.8966 eV | 157.01 nm | f=0.0421 | <S**2>=0.000 |  |
|                   | 24 -> 33     | 0.15714   |           |          |              |  |
|                   | 32 -> 41     | 0.65856   |           |          |              |  |

## [5,1,0]-TDDFT- Triplet

Excitation energies and oscillator strengths:

|               |    |            |           |            |          |              |
|---------------|----|------------|-----------|------------|----------|--------------|
| Excited State | 1: | 3.055-?Sym | 0.7058 eV | 1756.75 nm | f=0.0016 | <S**2>=2.083 |
|               |    | 33A -> 34A |           |            |          | 0.99424      |
| Excited State | 2: | 3.040-?Sym | 1.5700 eV | 789.70 nm  | f=0.0016 | <S**2>=2.060 |
|               |    | 31A -> 34A |           |            |          | 0.11917      |
|               |    | 31B -> 32B |           |            |          | 0.98517      |
| Excited State | 3: | 3.051-?Sym | 2.1345 eV | 580.87 nm  | f=0.0052 | <S**2>=2.077 |
|               |    | 31A -> 34A |           |            |          | -0.12465     |
|               |    | 33A -> 35A |           |            |          | 0.76695      |
|               |    | 29B -> 32B |           |            |          | 0.14256      |
|               |    | 30B -> 32B |           |            |          | -0.59444     |
| Excited State | 4: | 3.055-?Sym | 2.4296 eV | 510.32 nm  | f=0.0055 | <S**2>=2.083 |
|               |    | 31A -> 34A |           |            |          | 0.11625      |
|               |    | 32A -> 34A |           |            |          | -0.17403     |
|               |    | 33A -> 35A |           |            |          | 0.60219      |
|               |    | 29B -> 32B |           |            |          | 0.10100      |
|               |    | 30B -> 32B |           |            |          | 0.74016      |
|               |    | 31B -> 33B |           |            |          | -0.11884     |
| Excited State | 5: | 3.113-?Sym | 3.1266 eV | 396.55 nm  | f=0.0070 | <S**2>=2.173 |
|               |    | 30A -> 34A |           |            |          | -0.19679     |
|               |    | 31A -> 34A |           |            |          | -0.16677     |
|               |    | 32A -> 34A |           |            |          | 0.42620      |
|               |    | 33A -> 35A |           |            |          | -0.10065     |
|               |    | 29B -> 32B |           |            |          | 0.77515      |
|               |    | 30B -> 32B |           |            |          | 0.19022      |
|               |    | 30B -> 33B |           |            |          | 0.13998      |
|               |    | 31B -> 33B |           |            |          | 0.25168      |
| Excited State | 6: | 3.849-?Sym | 3.4344 eV | 361.00 nm  | f=0.0021 | <S**2>=3.454 |
|               |    | 30A -> 34A |           |            |          | 0.14512      |
|               |    | 31A -> 34A |           |            |          | 0.45191      |
|               |    | 32A -> 34A |           |            |          | 0.75174      |
|               |    | 29B -> 32B |           |            |          | -0.11599     |

|               |            |            |           |           |          |              |
|---------------|------------|------------|-----------|-----------|----------|--------------|
|               | 31B -> 33B | -0.42276   |           |           |          |              |
| Excited State | 7:         | 3.412-?Sym | 3.5503 eV | 349.22 nm | f=0.1353 | <S**2>=2.661 |
|               | 29A -> 34A | 0.12519    |           |           |          |              |
|               | 30A -> 34A | 0.28113    |           |           |          |              |
|               | 32A -> 34A | -0.32771   |           |           |          |              |
|               | 32A -> 35A | 0.13666    |           |           |          |              |
|               | 33A -> 34A | 0.11032    |           |           |          |              |
|               | 33A -> 35A | -0.13089   |           |           |          |              |
|               | 29B -> 32B | 0.53039    |           |           |          |              |
|               | 30B -> 32B | -0.19100   |           |           |          |              |
|               | 30B -> 33B | -0.38125   |           |           |          |              |
|               | 31B -> 33B | -0.48433   |           |           |          |              |
| Excited State | 8:         | 3.243-?Sym | 3.8730 eV | 320.13 nm | f=0.0016 | <S**2>=2.379 |
|               | 30A -> 34A | 0.30106    |           |           |          |              |
|               | 31A -> 34A | -0.24880   |           |           |          |              |
|               | 32A -> 34A | 0.14875    |           |           |          |              |
|               | 28B -> 32B | 0.84428    |           |           |          |              |
|               | 29B -> 32B | -0.10610   |           |           |          |              |
|               | 30B -> 33B | -0.26211   |           |           |          |              |
|               | 31B -> 33B | 0.12350    |           |           |          |              |
| Excited State | 9:         | 3.569-?Sym | 3.9275 eV | 315.68 nm | f=0.0054 | <S**2>=2.935 |
|               | 30A -> 34A | -0.49124   |           |           |          |              |
|               | 31A -> 34A | 0.24810    |           |           |          |              |
|               | 32A -> 34A | -0.20749   |           |           |          |              |
|               | 28B -> 32B | 0.51244    |           |           |          |              |
|               | 30B -> 33B | 0.44650    |           |           |          |              |
|               | 30B -> 34B | 0.10618    |           |           |          |              |
|               | 31B -> 33B | -0.38494   |           |           |          |              |
| Excited State | 10:        | 3.048-?Sym | 4.1025 eV | 302.22 nm | f=0.0306 | <S**2>=2.073 |
|               | 31A -> 34A | 0.72131    |           |           |          |              |
|               | 32A -> 34A | -0.11067   |           |           |          |              |
|               | 27B -> 32B | -0.14324   |           |           |          |              |
|               | 28B -> 32B | 0.13014    |           |           |          |              |
|               | 29B -> 32B | 0.11604    |           |           |          |              |
|               | 30B -> 32B | -0.11575   |           |           |          |              |
|               | 30B -> 33B | -0.17502   |           |           |          |              |

|                   |            |           |           |          |              |  |
|-------------------|------------|-----------|-----------|----------|--------------|--|
|                   | 31B -> 33B | 0.56324   |           |          |              |  |
| Excited State 11: | 3.045-?Sym | 4.1955 eV | 295.51 nm | f=0.0031 | <S**2>=2.068 |  |
|                   | 33A -> 36A | 0.99397   |           |          |              |  |
| Excited State 12: | 3.734-?Sym | 4.5518 eV | 272.39 nm | f=0.0048 | <S**2>=3.235 |  |
|                   | 31A -> 35A | -0.18352  |           |          |              |  |
|                   | 32A -> 35A | -0.34654  |           |          |              |  |
|                   | 30B -> 33B | -0.19450  |           |          |              |  |
|                   | 31B -> 34B | 0.87633   |           |          |              |  |
|                   | 31B -> 35B | 0.11262   |           |          |              |  |
| Excited State 13: | 3.166-?Sym | 4.7415 eV | 261.49 nm | f=0.0049 | <S**2>=2.256 |  |
|                   | 30A -> 34A | 0.18379   |           |          |              |  |
|                   | 32A -> 35A | -0.61204  |           |          |              |  |
|                   | 33A -> 37A | 0.63150   |           |          |              |  |
|                   | 30B -> 33B | 0.19272   |           |          |              |  |
|                   | 30B -> 34B | -0.16228  |           |          |              |  |
|                   | 31B -> 34B | -0.27225  |           |          |              |  |
|                   | 31B -> 35B | 0.14371   |           |          |              |  |
| Excited State 14: | 3.152-?Sym | 4.7631 eV | 260.30 nm | f=0.0093 | <S**2>=2.235 |  |
|                   | 32A -> 35A | 0.53470   |           |          |              |  |
|                   | 33A -> 37A | 0.75610   |           |          |              |  |
|                   | 27B -> 32B | -0.10583  |           |          |              |  |
|                   | 30B -> 34B | 0.15623   |           |          |              |  |
|                   | 31B -> 34B | 0.21925   |           |          |              |  |
|                   | 31B -> 35B | -0.11604  |           |          |              |  |
| Excited State 15: | 3.152-?Sym | 4.9345 eV | 251.26 nm | f=0.0065 | <S**2>=2.233 |  |
|                   | 30A -> 34A | -0.43041  |           |          |              |  |
|                   | 30A -> 35A | 0.16669   |           |          |              |  |
|                   | 31A -> 35A | 0.26093   |           |          |              |  |
|                   | 32A -> 35A | -0.13602  |           |          |              |  |
|                   | 33A -> 37A | 0.12626   |           |          |              |  |
|                   | 27B -> 32B | 0.61218   |           |          |              |  |
|                   | 30B -> 33B | -0.45672  |           |          |              |  |
|                   | 30B -> 34B | 0.16823   |           |          |              |  |
|                   | 31B -> 34B | -0.12943  |           |          |              |  |

Excited State 16: 3.135-?Sym 5.0542 eV 245.31 nm f=0.0098 <S\*\*2>=2.207

|            |          |
|------------|----------|
| 30A -> 34A | 0.35605  |
| 31A -> 34A | 0.14964  |
| 31A -> 35A | 0.33173  |
| 32A -> 35A | 0.26344  |
| 27B -> 32B | 0.57046  |
| 30B -> 33B | 0.35726  |
| 30B -> 34B | -0.34261 |
| 31B -> 34B | 0.20236  |

Excited State 17: 3.311-?Sym 5.1378 eV 241.32 nm f=0.0029 <S\*\*2>=2.491

|            |          |
|------------|----------|
| 31A -> 35A | 0.70221  |
| 32A -> 35A | -0.11431 |
| 25B -> 32B | 0.18830  |
| 26B -> 32B | 0.34947  |
| 27B -> 32B | -0.39426 |
| 29B -> 33B | -0.26555 |
| 31B -> 34B | 0.13855  |
| 31B -> 35B | -0.23950 |

Excited State 18: 3.090-?Sym 5.2371 eV 236.74 nm f=0.0033 <S\*\*2>=2.137

|            |          |
|------------|----------|
| 31A -> 35A | -0.31488 |
| 32A -> 35A | 0.11305  |
| 25B -> 32B | 0.12581  |
| 26B -> 32B | 0.88565  |
| 27B -> 32B | 0.16721  |
| 30B -> 34B | 0.12055  |
| 31B -> 35B | 0.10756  |

Excited State 19: 3.802-?Sym 5.3381 eV 232.26 nm f=0.0007 <S\*\*2>=3.364

|            |          |
|------------|----------|
| 29A -> 34A | 0.41328  |
| 30A -> 34A | -0.13081 |
| 30A -> 35A | 0.25401  |
| 25B -> 32B | -0.22625 |
| 26B -> 32B | 0.22179  |
| 29B -> 33B | 0.55143  |
| 30B -> 33B | 0.12680  |
| 30B -> 34B | -0.41665 |
| 30B -> 35B | -0.10277 |
| 31B -> 35B | -0.31638 |

|               |     |            |           |           |          |              |
|---------------|-----|------------|-----------|-----------|----------|--------------|
| Excited State | 20: | 3.077-?Sym | 5.3988 eV | 229.65 nm | f=0.0070 | <S**2>=2.117 |
|               |     | 29A -> 34A | 0.13243   |           |          |              |
|               |     | 33A -> 38A | 0.88597   |           |          |              |
|               |     | 25B -> 32B | -0.12480  |           |          |              |
|               |     | 30B -> 34B | -0.19306  |           |          |              |
|               |     | 31B -> 35B | 0.29447   |           |          |              |
| Excited State | 21: | 3.164-?Sym | 5.4637 eV | 226.92 nm | f=0.0061 | <S**2>=2.252 |
|               |     | 29A -> 34A | -0.15322  |           |          |              |
|               |     | 30A -> 35A | 0.19198   |           |          |              |
|               |     | 31A -> 35A | -0.23775  |           |          |              |
|               |     | 33A -> 38A | 0.33836   |           |          |              |
|               |     | 25B -> 32B | 0.62410   |           |          |              |
|               |     | 26B -> 32B | -0.13929  |           |          |              |
|               |     | 31B -> 35B | -0.55680  |           |          |              |
| Excited State | 22: | 3.400-?Sym | 5.4961 eV | 225.59 nm | f=0.0085 | <S**2>=2.641 |
|               |     | 29A -> 34A | 0.24564   |           |          |              |
|               |     | 30A -> 35A | -0.18500  |           |          |              |
|               |     | 31A -> 34A | -0.11027  |           |          |              |
|               |     | 31A -> 35A | 0.23841   |           |          |              |
|               |     | 25B -> 32B | 0.55149   |           |          |              |
|               |     | 29B -> 33B | 0.52441   |           |          |              |
|               |     | 30B -> 34B | 0.18683   |           |          |              |
|               |     | 31B -> 35B | 0.44207   |           |          |              |
| Excited State | 23: | 3.454-?Sym | 5.5606 eV | 222.97 nm | f=0.0419 | <S**2>=2.732 |
|               |     | 28A -> 34A | -0.15604  |           |          |              |
|               |     | 29A -> 34A | 0.32418   |           |          |              |
|               |     | 30A -> 34A | 0.24709   |           |          |              |
|               |     | 30A -> 35A | -0.32737  |           |          |              |
|               |     | 32A -> 35A | -0.17950  |           |          |              |
|               |     | 33A -> 38A | 0.22310   |           |          |              |
|               |     | 33A -> 41A | 0.14720   |           |          |              |
|               |     | 23B -> 32B | 0.11497   |           |          |              |
|               |     | 24B -> 32B | 0.11898   |           |          |              |
|               |     | 25B -> 32B | -0.28254  |           |          |              |
|               |     | 27B -> 32B | 0.14682   |           |          |              |
|               |     | 30B -> 33B | 0.11702   |           |          |              |
|               |     | 30B -> 34B | 0.51646   |           |          |              |

|                   |            |           |           |          |              |  |
|-------------------|------------|-----------|-----------|----------|--------------|--|
|                   | 30B -> 35B | 0.12832   |           |          |              |  |
|                   | 31B -> 35B | -0.32690  |           |          |              |  |
| Excited State 24: | 3.622-?Sym | 5.6899 eV | 217.90 nm | f=0.0051 | <S**2>=3.029 |  |
|                   | 28A -> 34A | 0.75269   |           |          |              |  |
|                   | 29A -> 34A | -0.36138  |           |          |              |  |
|                   | 30A -> 35A | -0.14356  |           |          |              |  |
|                   | 31A -> 35A | 0.10485   |           |          |              |  |
|                   | 33A -> 38A | 0.10700   |           |          |              |  |
|                   | 33A -> 39A | -0.35199  |           |          |              |  |
|                   | 33A -> 41A | 0.10234   |           |          |              |  |
|                   | 28B -> 33B | -0.12168  |           |          |              |  |
|                   | 29B -> 33B | 0.24806   |           |          |              |  |
| Excited State 25: | 3.235-?Sym | 5.7129 eV | 217.03 nm | f=0.0014 | <S**2>=2.366 |  |
|                   | 28A -> 34A | 0.42229   |           |          |              |  |
|                   | 29A -> 34A | 0.15242   |           |          |              |  |
|                   | 30A -> 35A | -0.19631  |           |          |              |  |
|                   | 33A -> 39A | 0.81821   |           |          |              |  |
|                   | 33A -> 40A | -0.10483  |           |          |              |  |
|                   | 30B -> 35B | 0.16041   |           |          |              |  |
|                   | 31B -> 35B | -0.10785  |           |          |              |  |
| Excited State 26: | 3.112-?Sym | 5.7630 eV | 215.14 nm | f=0.0079 | <S**2>=2.171 |  |
|                   | 28A -> 34A | 0.30171   |           |          |              |  |
|                   | 29A -> 34A | 0.50185   |           |          |              |  |
|                   | 30A -> 35A | -0.12206  |           |          |              |  |
|                   | 33A -> 39A | -0.33856  |           |          |              |  |
|                   | 33A -> 40A | 0.31559   |           |          |              |  |
|                   | 33A -> 41A | -0.46281  |           |          |              |  |
|                   | 25B -> 32B | 0.18505   |           |          |              |  |
|                   | 29B -> 33B | -0.35179  |           |          |              |  |
| Excited State 27: | 3.052-?Sym | 5.8171 eV | 213.14 nm | f=0.0032 | <S**2>=2.079 |  |
|                   | 29A -> 34A | -0.17850  |           |          |              |  |
|                   | 33A -> 39A | 0.20170   |           |          |              |  |
|                   | 33A -> 40A | 0.93332   |           |          |              |  |
|                   | 33A -> 41A | 0.14297   |           |          |              |  |
|                   | 29B -> 33B | 0.11208   |           |          |              |  |

|                   |            |           |           |          |              |
|-------------------|------------|-----------|-----------|----------|--------------|
| Excited State 28: | 3.145-?Sym | 5.9109 eV | 209.76 nm | f=0.0158 | <S**2>=2.223 |
| 28A -> 34A        | 0.25267    |           |           |          |              |
| 29A -> 34A        | 0.29613    |           |           |          |              |
| 30A -> 35A        | 0.16282    |           |           |          |              |
| 33A -> 41A        | 0.71245    |           |           |          |              |
| 23B -> 32B        | -0.13492   |           |           |          |              |
| 24B -> 32B        | -0.20111   |           |           |          |              |
| 29B -> 33B        | -0.24156   |           |           |          |              |
| 29B -> 34B        | 0.11389    |           |           |          |              |
| 30B -> 34B        | 0.13742    |           |           |          |              |
| 30B -> 35B        | -0.26670   |           |           |          |              |
| Excited State 29: | 3.383-?Sym | 5.9265 eV | 209.20 nm | f=0.0634 | <S**2>=2.611 |
| 28A -> 34A        | -0.14680   |           |           |          |              |
| 30A -> 34A        | -0.18411   |           |           |          |              |
| 30A -> 35A        | -0.44665   |           |           |          |              |
| 31A -> 35A        | -0.10234   |           |           |          |              |
| 33A -> 39A        | -0.13968   |           |           |          |              |
| 33A -> 41A        | 0.33869    |           |           |          |              |
| 33A -> 42A        | 0.13019    |           |           |          |              |
| 25B -> 32B        | 0.10852    |           |           |          |              |
| 28B -> 33B        | 0.15265    |           |           |          |              |
| 29B -> 34B        | 0.23277    |           |           |          |              |
| 30B -> 33B        | -0.18230   |           |           |          |              |
| 30B -> 34B        | -0.33393   |           |           |          |              |
| 30B -> 35B        | 0.52496    |           |           |          |              |
| 31B -> 35B        | -0.13131   |           |           |          |              |
| Excited State 30: | 3.132-?Sym | 6.0243 eV | 205.81 nm | f=0.0023 | <S**2>=2.203 |
| 28A -> 34A        | 0.10621    |           |           |          |              |
| 23B -> 32B        | -0.17081   |           |           |          |              |
| 24B -> 32B        | 0.85032    |           |           |          |              |
| 28B -> 33B        | 0.32061    |           |           |          |              |
| 29B -> 34B        | 0.17439    |           |           |          |              |
| 30B -> 35B        | -0.20969   |           |           |          |              |

---

**Table S3.** The vertical excitation energies and oscillator strengths for the thirty lowest energy triplet excited states of molecule bicyclo[2,1,0]pentan-2-one at the TD-DFT/M06-L/6-311G(d,p).



## [2,1,0]-TDDFT- Singlet

Excitation energies and oscillator strengths:

|                  |              |           |           |          |              |
|------------------|--------------|-----------|-----------|----------|--------------|
| Excited State 1: | Singlet-?Sym | 4.8172 eV | 257.38 nm | f=0.0006 | <S**2>=0.000 |
| 22 -> 23         | 0.70671      |           |           |          |              |
| Excited State 2: | Singlet-?Sym | 6.4329 eV | 192.74 nm | f=0.0390 | <S**2>=0.000 |
| 20 -> 23         | -0.19860     |           |           |          |              |
| 21 -> 23         | 0.67155      |           |           |          |              |
| Excited State 3: | Singlet-?Sym | 7.0585 eV | 175.65 nm | f=0.0120 | <S**2>=0.000 |
| 22 -> 24         | 0.70636      |           |           |          |              |
| Excited State 4: | Singlet-?Sym | 7.2836 eV | 170.22 nm | f=0.0545 | <S**2>=0.000 |
| 19 -> 23         | -0.15090     |           |           |          |              |
| 20 -> 23         | 0.64849      |           |           |          |              |
| 21 -> 23         | 0.16778      |           |           |          |              |
| Excited State 5: | Singlet-?Sym | 7.5446 eV | 164.34 nm | f=0.0082 | <S**2>=0.000 |
| 22 -> 25         | 0.70571      |           |           |          |              |
| Excited State 6: | Singlet-?Sym | 7.7287 eV | 160.42 nm | f=0.0047 | <S**2>=0.000 |
| 19 -> 23         | -0.10220     |           |           |          |              |
| 22 -> 26         | 0.69704      |           |           |          |              |
| Excited State 7: | Singlet-?Sym | 8.1116 eV | 152.85 nm | f=0.0075 | <S**2>=0.000 |
| 19 -> 23         | -0.17698     |           |           |          |              |
| 22 -> 27         | 0.68078      |           |           |          |              |
| Excited State 8: | Singlet-?Sym | 8.2223 eV | 150.79 nm | f=0.0152 | <S**2>=0.000 |
| 18 -> 23         | 0.27247      |           |           |          |              |
| 19 -> 23         | 0.59564      |           |           |          |              |
| 21 -> 24         | 0.10591      |           |           |          |              |
| 22 -> 27         | 0.16071      |           |           |          |              |
| Excited State 9: | Singlet-?Sym | 8.3299 eV | 148.84 nm | f=0.432  | <S**2>=0.000 |
| 22 -> 28         | 0.70078      |           |           |          |              |

|                   |              |           |           |          |              |
|-------------------|--------------|-----------|-----------|----------|--------------|
| Excited State 10: | Singlet-?Sym | 8.4613 eV | 146.53 nm | f=0.0140 | <S**2>=0.000 |
| 21 -> 24          | 0.68071      |           |           |          |              |
| Excited State 11: | Singlet-?Sym | 8.7527 eV | 141.65 nm | f=0.0334 | <S**2>=0.000 |
| 18 -> 23          | -0.10297     |           |           |          |              |
| 22 -> 29          | 0.68099      |           |           |          |              |
| Excited State 12: | Singlet-?Sym | 8.9718 eV | 138.19 nm | f=0.0410 | <S**2>=0.000 |
| 17 -> 23          | -0.30670     |           |           |          |              |
| 21 -> 25          | 0.62942      |           |           |          |              |
| Excited State 13: | Singlet-?Sym | 9.0045 eV | 137.69 nm | f=0.0119 | <S**2>=0.000 |
| 17 -> 23          | 0.57942      |           |           |          |              |
| 18 -> 23          | -0.19254     |           |           |          |              |
| 21 -> 25          | 0.29792      |           |           |          |              |
| 22 -> 30          | -0.13678     |           |           |          |              |
| Excited State 14: | Singlet-?Sym | 9.1227 eV | 135.91 nm | f=0.0221 | <S**2>=0.000 |
| 16 -> 23          | -0.28764     |           |           |          |              |
| 17 -> 23          | 0.21307      |           |           |          |              |
| 18 -> 23          | 0.42516      |           |           |          |              |
| 19 -> 23          | -0.12990     |           |           |          |              |
| 22 -> 30          | 0.37069      |           |           |          |              |
| Excited State 15: | Singlet-?Sym | 9.1844 eV | 134.99 nm | f=0.0101 | <S**2>=0.000 |
| 20 -> 24          | 0.68011      |           |           |          |              |
| 22 -> 30          | 0.10022      |           |           |          |              |
| Excited State 16: | Singlet-?Sym | 9.2889 eV | 133.48 nm | f=0.0055 | <S**2>=0.000 |
| 16 -> 23          | 0.47656      |           |           |          |              |
| 21 -> 26          | 0.22669      |           |           |          |              |
| 22 -> 30          | 0.44728      |           |           |          |              |
| Excited State 17: | Singlet-?Sym | 9.4211 eV | 131.60 nm | f=0.0394 | <S**2>=0.000 |
| 16 -> 23          | -0.10659     |           |           |          |              |
| 20 -> 25          | 0.10266      |           |           |          |              |
| 21 -> 26          | 0.31439      |           |           |          |              |
| 21 -> 27          | 0.56761      |           |           |          |              |
| 21 -> 28          | 0.15853      |           |           |          |              |

|                   |              |           |           |          |              |  |
|-------------------|--------------|-----------|-----------|----------|--------------|--|
|                   | 22 -> 30     | -0.12709  |           |          |              |  |
| Excited State 18: | Singlet-?Sym | 9.5476 eV | 129.86 nm | f=0.0556 | <S**2>=0.000 |  |
|                   | 20 -> 25     | -0.29123  |           |          |              |  |
|                   | 20 -> 26     | -0.11295  |           |          |              |  |
|                   | 21 -> 26     | -0.34780  |           |          |              |  |
|                   | 21 -> 27     | 0.39482   |           |          |              |  |
|                   | 21 -> 28     | -0.30652  |           |          |              |  |
| Excited State 19: | Singlet-?Sym | 9.6608 eV | 128.34 nm | f=0.0160 | <S**2>=0.000 |  |
|                   | 20 -> 25     | 0.60842   |           |          |              |  |
|                   | 21 -> 26     | -0.11476  |           |          |              |  |
|                   | 21 -> 28     | -0.32084  |           |          |              |  |
| Excited State 20: | Singlet-?Sym | 9.7983 eV | 126.54 nm | f=0.1467 | <S**2>=0.000 |  |
|                   | 15 -> 23     | 0.14819   |           |          |              |  |
|                   | 16 -> 23     | 0.34294   |           |          |              |  |
|                   | 18 -> 23     | 0.29958   |           |          |              |  |
|                   | 19 -> 23     | -0.15289  |           |          |              |  |
|                   | 20 -> 23     | -0.10622  |           |          |              |  |
|                   | 20 -> 24     | 0.10342   |           |          |              |  |
|                   | 20 -> 26     | 0.19409   |           |          |              |  |
|                   | 21 -> 29     | 0.10020   |           |          |              |  |
|                   | 22 -> 30     | -0.28010  |           |          |              |  |
|                   | 22 -> 32     | -0.13707  |           |          |              |  |
| Excited State 21: | Singlet-?Sym | 9.8429 eV | 125.96 nm | f=0.0182 | <S**2>=0.000 |  |
|                   | 16 -> 23     | 0.10573   |           |          |              |  |
|                   | 20 -> 25     | 0.16395   |           |          |              |  |
|                   | 20 -> 26     | -0.12452  |           |          |              |  |
|                   | 21 -> 26     | -0.33245  |           |          |              |  |
|                   | 21 -> 28     | 0.50139   |           |          |              |  |
|                   | 21 -> 30     | 0.10968   |           |          |              |  |
|                   | 22 -> 31     | -0.14072  |           |          |              |  |
| Excited State 22: | Singlet-?Sym | 9.9827 eV | 124.20 nm | f=0.0405 | <S**2>=0.000 |  |
|                   | 18 -> 23     | -0.13406  |           |          |              |  |
|                   | 20 -> 26     | 0.59599   |           |          |              |  |
|                   | 20 -> 27     | 0.21737   |           |          |              |  |
|                   | 21 -> 26     | -0.12674  |           |          |              |  |

|                   |              |            |           |          |              |
|-------------------|--------------|------------|-----------|----------|--------------|
| Excited State 23: | Singlet-?Sym | 10.1119 eV | 122.61 nm | f=0.0059 | <S**2>=0.000 |
| 21 -> 29          | 0.67545      |            |           |          |              |
| 22 -> 31          | -0.13612     |            |           |          |              |
| Excited State 24: | Singlet-?Sym | 10.1947 eV | 121.62 nm | f=0.0058 | <S**2>=0.000 |
| 20 -> 27          | 0.24190      |            |           |          |              |
| 21 -> 29          | 0.10049      |            |           |          |              |
| 22 -> 31          | 0.63188      |            |           |          |              |
| Excited State 25: | Singlet-?Sym | 10.2542 eV | 120.91 nm | f=0.0228 | <S**2>=0.000 |
| 19 -> 24          | -0.10805     |            |           |          |              |
| 20 -> 26          | -0.14324     |            |           |          |              |
| 20 -> 27          | 0.59637      |            |           |          |              |
| 20 -> 28          | -0.16077     |            |           |          |              |
| 21 -> 26          | 0.12484      |            |           |          |              |
| 21 -> 30          | -0.11989     |            |           |          |              |
| 22 -> 31          | -0.19322     |            |           |          |              |
| Excited State 26: | Singlet-?Sym | 10.3860 eV | 119.38 nm | f=0.0221 | <S**2>=0.000 |
| 19 -> 24          | 0.63091      |            |           |          |              |
| 22 -> 32          | -0.27357     |            |           |          |              |
| Excited State 27: | Singlet-?Sym | 10.5102 eV | 117.97 nm | f=0.0778 | <S**2>=0.000 |
| 15 -> 23          | 0.16559      |            |           |          |              |
| 19 -> 24          | 0.20666      |            |           |          |              |
| 20 -> 28          | 0.15343      |            |           |          |              |
| 21 -> 30          | -0.18434     |            |           |          |              |
| 22 -> 32          | 0.56892      |            |           |          |              |
| Excited State 28: | Singlet-?Sym | 10.6160 eV | 116.79 nm | f=0.0961 | <S**2>=0.000 |
| 20 -> 26          | -0.12523     |            |           |          |              |
| 20 -> 27          | 0.11163      |            |           |          |              |
| 20 -> 28          | 0.62242      |            |           |          |              |
| 20 -> 29          | -0.11558     |            |           |          |              |
| 21 -> 30          | 0.10121      |            |           |          |              |
| 22 -> 32          | -0.13431     |            |           |          |              |
| Excited State 29: | Singlet-?Sym | 10.6932 eV | 115.95 nm | f=0.0475 | <S**2>=0.000 |
| 15 -> 23          | -0.17435     |            |           |          |              |

|          |         |
|----------|---------|
| 19 -> 24 | 0.10442 |
| 21 -> 30 | 0.60257 |
| 22 -> 32 | 0.16793 |

|                   |              |            |           |          |              |
|-------------------|--------------|------------|-----------|----------|--------------|
| Excited State 30: | Singlet-?Sym | 10.7714 eV | 115.10 nm | f=0.0214 | <S**2>=0.000 |
| 15 -> 23          | 0.49307      |            |           |          |              |
| 18 -> 23          | -0.10102     |            |           |          |              |
| 18 -> 24          | -0.20178     |            |           |          |              |
| 20 -> 29          | -0.32164     |            |           |          |              |
| 21 -> 30          | 0.18871      |            |           |          |              |

---

### [2,1,0]-TDDFT- Triplet

Excitation energies and oscillator strengths:

|                  |            |           |           |          |              |
|------------------|------------|-----------|-----------|----------|--------------|
| Excited State 1: | 3.009-?Sym | 1.5236 eV | 813.74 nm | f=0.0005 | <S**2>=2.013 |
| 20B -> 22B       | 0.12096    |           |           |          |              |
| 21B -> 22B       | 0.99039    |           |           |          |              |

|                  |            |           |           |          |              |
|------------------|------------|-----------|-----------|----------|--------------|
| Excited State 2: | 3.008-?Sym | 2.2126 eV | 560.35 nm | f=0.0008 | <S**2>=2.012 |
| 19B -> 22B       | -0.11110   |           |           |          |              |
| 20B -> 22B       | 0.98118    |           |           |          |              |
| 21B -> 22B       | -0.12926   |           |           |          |              |

|                  |            |           |           |          |              |
|------------------|------------|-----------|-----------|----------|--------------|
| Excited State 3: | 3.009-?Sym | 3.3141 eV | 374.12 nm | f=0.0016 | <S**2>=2.014 |
| 23A -> 24A       | 0.99140    |           |           |          |              |

|                  |            |           |           |          |              |
|------------------|------------|-----------|-----------|----------|--------------|
| Excited State 4: | 3.007-?Sym | 3.3318 eV | 372.12 nm | f=0.0002 | <S**2>=2.011 |
| 18B -> 22B       | 0.25262    |           |           |          |              |
| 19B -> 22B       | 0.95076    |           |           |          |              |
| 20B -> 22B       | 0.13573    |           |           |          |              |

|                  |            |           |           |          |              |
|------------------|------------|-----------|-----------|----------|--------------|
| Excited State 5: | 3.008-?Sym | 3.6922 eV | 335.80 nm | f=0.0021 | <S**2>=2.012 |
| 23A -> 25A       | 0.98327    |           |           |          |              |
| 23A -> 26A       | 0.15600    |           |           |          |              |

|                  |            |           |           |          |              |
|------------------|------------|-----------|-----------|----------|--------------|
| Excited State 6: | 3.012-?Sym | 3.7777 eV | 328.20 nm | f=0.0087 | <S**2>=2.018 |
| 23A -> 25A       | -0.12792   |           |           |          |              |
| 23A -> 26A       | 0.89901    |           |           |          |              |

|                   |                                                      |
|-------------------|------------------------------------------------------|
| 18B -> 22B        | -0.36378                                             |
| 19B -> 22B        | 0.14836                                              |
| Excited State 7:  | 3.009-?Sym 3.8634 eV 320.92 nm f=0.0152 <S**2>=2.013 |
| 23A -> 26A        | 0.36634                                              |
| 17B -> 22B        | 0.15635                                              |
| 18B -> 22B        | 0.87734                                              |
| 19B -> 22B        | -0.22790                                             |
| Excited State 8:  | 3.009-?Sym 4.3804 eV 283.04 nm f=0.0019 <S**2>=2.013 |
| 23A -> 27A        | 0.93498                                              |
| 23A -> 28A        | -0.12501                                             |
| 16B -> 22B        | -0.12818                                             |
| 17B -> 22B        | -0.29399                                             |
| Excited State 9:  | 3.010-?Sym 4.4688 eV 277.45 nm f=0.0016 <S**2>=2.016 |
| 23A -> 27A        | 0.19560                                              |
| 23A -> 28A        | 0.94855                                              |
| 16B -> 22B        | 0.15602                                              |
| 17B -> 22B        | 0.14979                                              |
| Excited State 10: | 3.009-?Sym 4.5445 eV 272.82 nm f=0.0431 <S**2>=2.014 |
| 23A -> 26A        | -0.10828                                             |
| 23A -> 27A        | 0.26632                                              |
| 23A -> 28A        | -0.25268                                             |
| 23A -> 29A        | 0.11261                                              |
| 16B -> 22B        | 0.51040                                              |
| 17B -> 22B        | 0.73584                                              |
| 18B -> 22B        | -0.14290                                             |
| Excited State 11: | 3.007-?Sym 4.7455 eV 261.27 nm f=0.0353 <S**2>=2.011 |
| 23A -> 30A        | 0.15779                                              |
| 16B -> 22B        | 0.80715                                              |
| 17B -> 22B        | -0.51837                                             |
| Excited State 12: | 3.009-?Sym 4.8344 eV 256.46 nm f=0.0056 <S**2>=2.013 |
| 23A -> 28A        | 0.12075                                              |
| 23A -> 29A        | 0.98380                                              |
| 16B -> 22B        | -0.10113                                             |

|                   |            |           |           |          |              |
|-------------------|------------|-----------|-----------|----------|--------------|
| Excited State 13: | 3.010-?Sym | 5.3503 eV | 231.73 nm | f=0.0230 | <S**2>=2.015 |
| 23A -> 30A        | 0.97445    |           |           |          |              |
| 16B -> 22B        | -0.10655   |           |           |          |              |
| Excited State 14: | 3.008-?Sym | 5.8016 eV | 213.71 nm | f=0.0003 | <S**2>=2.012 |
| 14B -> 22B        | 0.10951    |           |           |          |              |
| 15B -> 22B        | 0.98760    |           |           |          |              |
| Excited State 15: | 3.010-?Sym | 6.2928 eV | 197.02 nm | f=0.0074 | <S**2>=2.016 |
| 23A -> 31A        | 0.88213    |           |           |          |              |
| 23A -> 32A        | -0.18116   |           |           |          |              |
| 14B -> 22B        | 0.41097    |           |           |          |              |
| Excited State 16: | 3.013-?Sym | 6.4140 eV | 193.30 nm | f=0.0272 | <S**2>=2.019 |
| 23A -> 31A        | -0.39921   |           |           |          |              |
| 14B -> 22B        | 0.85440    |           |           |          |              |
| 20B -> 23B        | -0.13448   |           |           |          |              |
| 21B -> 23B        | -0.22110   |           |           |          |              |
| Excited State 17: | 3.011-?Sym | 6.5025 eV | 190.67 nm | f=0.0017 | <S**2>=2.017 |
| 23A -> 31A        | 0.16728    |           |           |          |              |
| 23A -> 32A        | 0.95655    |           |           |          |              |
| 14B -> 22B        | 0.10065    |           |           |          |              |
| 21B -> 23B        | -0.16866   |           |           |          |              |
| Excited State 18: | 3.048-?Sym | 6.9034 eV | 179.60 nm | f=0.0411 | <S**2>=2.073 |
| 23A -> 32A        | 0.13004    |           |           |          |              |
| 13B -> 22B        | -0.23446   |           |           |          |              |
| 14B -> 22B        | 0.13720    |           |           |          |              |
| 20B -> 23B        | -0.18831   |           |           |          |              |
| 21B -> 23B        | 0.90462    |           |           |          |              |
| Excited State 19: | 3.011-?Sym | 7.0009 eV | 177.10 nm | f=0.0195 | <S**2>=2.017 |
| 13B -> 22B        | 0.96119    |           |           |          |              |
| 20B -> 23B        | -0.10814   |           |           |          |              |
| 21B -> 23B        | 0.19394    |           |           |          |              |
| Excited State 20: | 3.011-?Sym | 7.2146 eV | 171.85 nm | f=0.0109 | <S**2>=2.017 |
| 23A -> 33A        | 0.97997    |           |           |          |              |
| 20B -> 23B        | -0.15193   |           |           |          |              |

|                   |            |           |           |          |              |
|-------------------|------------|-----------|-----------|----------|--------------|
| Excited State 21: | 3.058-?Sym | 7.6793 eV | 161.45 nm | f=0.0665 | <S**2>=2.088 |
| 23A -> 33A        | 0.12404    |           |           |          |              |
| 14B -> 22B        | 0.11571    |           |           |          |              |
| 19B -> 23B        | 0.14279    |           |           |          |              |
| 20B -> 23B        | 0.92339    |           |           |          |              |
| 21B -> 23B        | 0.14646    |           |           |          |              |
|                   |            |           |           |          |              |
| Excited State 22: | 3.187-?Sym | 7.8723 eV | 157.50 nm | f=0.0014 | <S**2>=2.290 |
| 22A -> 24A        | 0.10707    |           |           |          |              |
| 22A -> 26A        | -0.14340   |           |           |          |              |
| 23A -> 34A        | 0.91516    |           |           |          |              |
| 21B -> 24B        | -0.21406   |           |           |          |              |
| 21B -> 26B        | -0.20480   |           |           |          |              |
|                   |            |           |           |          |              |
| Excited State 23: | 3.931-?Sym | 7.9987 eV | 155.00 nm | f=0.0018 | <S**2>=3.613 |
| 21A -> 24A        | 0.10320    |           |           |          |              |
| 21A -> 26A        | -0.13951   |           |           |          |              |
| 22A -> 24A        | -0.32457   |           |           |          |              |
| 22A -> 25A        | -0.18271   |           |           |          |              |
| 22A -> 26A        | 0.36015    |           |           |          |              |
| 23A -> 34A        | 0.38026    |           |           |          |              |
| 21B -> 24B        | 0.58462    |           |           |          |              |
| 21B -> 26B        | 0.38499    |           |           |          |              |
| 21B -> 28B        | -0.10584   |           |           |          |              |
|                   |            |           |           |          |              |
| Excited State 24: | 3.019-?Sym | 8.2980 eV | 149.42 nm | f=0.0159 | <S**2>=2.029 |
| 12B -> 22B        | 0.98617    |           |           |          |              |
|                   |            |           |           |          |              |
| Excited State 25: | 3.774-?Sym | 8.4029 eV | 147.55 nm | f=0.0088 | <S**2>=3.311 |
| 21A -> 26A        | 0.10169    |           |           |          |              |
| 22A -> 25A        | 0.21284    |           |           |          |              |
| 22A -> 26A        | -0.32788   |           |           |          |              |
| 23A -> 35A        | 0.10041    |           |           |          |              |
| 21B -> 24B        | 0.72988    |           |           |          |              |
| 21B -> 26B        | -0.48402   |           |           |          |              |
| 21B -> 28B        | 0.11928    |           |           |          |              |
|                   |            |           |           |          |              |
| Excited State 26: | 3.375-?Sym | 8.5751 eV | 144.59 nm | f=0.0047 | <S**2>=2.598 |
| 22A -> 24A        | 0.91802    |           |           |          |              |



|                   |            |           |           |          |              |  |
|-------------------|------------|-----------|-----------|----------|--------------|--|
|                   | 22A -> 25A | -0.13403  |           |          |              |  |
|                   | 22A -> 26A | 0.20544   |           |          |              |  |
|                   | 19B -> 23B | -0.11145  |           |          |              |  |
|                   | 21B -> 24B | 0.19801   |           |          |              |  |
|                   | 21B -> 26B | 0.13685   |           |          |              |  |
| Excited State 27: | 3.049-?Sym | 8.6605 eV | 143.16 nm | f=0.0037 | <S**2>=2.074 |  |
|                   | 22A -> 26A | 0.10562   |           |          |              |  |
|                   | 23A -> 35A | 0.95522   |           |          |              |  |
|                   | 19B -> 23B | -0.16509  |           |          |              |  |
| Excited State 28: | 3.427-?Sym | 8.7613 eV | 141.51 nm | f=0.0048 | <S**2>=2.686 |  |
|                   | 20A -> 24A | 0.12979   |           |          |              |  |
|                   | 21A -> 24A | 0.79501   |           |          |              |  |
|                   | 22A -> 26A | -0.14120  |           |          |              |  |
|                   | 23A -> 35A | 0.18121   |           |          |              |  |
|                   | 19B -> 23B | 0.22829   |           |          |              |  |
|                   | 20B -> 24B | -0.37574  |           |          |              |  |
|                   | 21B -> 25B | 0.18745   |           |          |              |  |
| Excited State 29: | 3.671-?Sym | 8.7925 eV | 141.01 nm | f=0.0196 | <S**2>=3.119 |  |
|                   | 21A -> 24A | -0.20812  |           |          |              |  |
|                   | 22A -> 25A | -0.14180  |           |          |              |  |
|                   | 18B -> 23B | 0.10915   |           |          |              |  |
|                   | 19B -> 23B | -0.23190  |           |          |              |  |
|                   | 21B -> 25B | 0.91137   |           |          |              |  |
| Excited State 30: | 3.070-?Sym | 8.8601 eV | 139.94 nm | f=0.0342 | <S**2>=2.106 |  |
|                   | 21A -> 24A | -0.36552  |           |          |              |  |
|                   | 21A -> 25A | 0.11689   |           |          |              |  |
|                   | 21A -> 26A | -0.12645  |           |          |              |  |
|                   | 23A -> 35A | 0.14632   |           |          |              |  |
|                   | 18B -> 23B | -0.21578  |           |          |              |  |
|                   | 19B -> 23B | 0.82191   |           |          |              |  |
|                   | 21B -> 25B | 0.15671   |           |          |              |  |

---



---

### [4,1,0]-TDDFT- Singlet

Excitation energies and oscillator strengths:

|                  |              |           |           |          |              |
|------------------|--------------|-----------|-----------|----------|--------------|
| Excited State 1: | Singlet-?Sym | 4.4165 eV | 280.73 nm | f=0.0018 | <S**2>=0.000 |
| 29 -> 30         | 0.70504      |           |           |          |              |
| Excited State 2: | Singlet-?Sym | 5.0346 eV | 246.26 nm | f=0.0039 | <S**2>=0.000 |
| 28 -> 30         | -0.18257     |           |           |          |              |
| 28 -> 31         | 0.14529      |           |           |          |              |
| 29 -> 31         | 0.66494      |           |           |          |              |
| Excited State 3: | Singlet-?Sym | 5.2730 eV | 235.13 nm | f=0.0088 | <S**2>=0.000 |
| 28 -> 30         | 0.66407      |           |           |          |              |
| 28 -> 31         | 0.18228      |           |           |          |              |
| 29 -> 31         | 0.14607      |           |           |          |              |
| Excited State 4: | Singlet-?Sym | 6.4504 eV | 192.21 nm | f=0.0041 | <S**2>=0.000 |
| 29 -> 32         | 0.70131      |           |           |          |              |
| Excited State 5: | Singlet-?Sym | 6.4973 eV | 190.82 nm | f=0.0502 | <S**2>=0.000 |
| 27 -> 30         | 0.36571      |           |           |          |              |
| 27 -> 31         | -0.19770     |           |           |          |              |
| 28 -> 30         | -0.12691     |           |           |          |              |
| 28 -> 31         | 0.51355      |           |           |          |              |
| 29 -> 31         | -0.11388     |           |           |          |              |
| Excited State 6: | Singlet-?Sym | 6.8742 eV | 180.36 nm | f=0.0063 | <S**2>=0.000 |
| 29 -> 33         | 0.70051      |           |           |          |              |
| Excited State 7: | Singlet-?Sym | 7.0496 eV | 175.87 nm | f=0.0887 | <S**2>=0.000 |
| 26 -> 31         | -0.10468     |           |           |          |              |
| 27 -> 30         | -0.23543     |           |           |          |              |
| 27 -> 31         | 0.55209      |           |           |          |              |
| 28 -> 31         | 0.29875      |           |           |          |              |
| Excited State 8: | Singlet-?Sym | 7.1823 eV | 172.62 nm | f=0.2105 | <S**2>=0.000 |
| 23 -> 30         | 0.10657      |           |           |          |              |
| 24 -> 30         | -0.10453     |           |           |          |              |
| 27 -> 30         | 0.49389      |           |           |          |              |
| 27 -> 31         | 0.36244      |           |           |          |              |
| 28 -> 31         | -0.19628     |           |           |          |              |
| 28 -> 32         | -0.10654     |           |           |          |              |

|                   |              |           |           |          |              |
|-------------------|--------------|-----------|-----------|----------|--------------|
| Excited State 9:  | Singlet-?Sym | 7.3064 eV | 169.69 nm | f=0.0024 | <S**2>=0.000 |
| 28 -> 32          | 0.69330      |           |           |          |              |
| Excited State 10: | Singlet-?Sym | 7.4588 eV | 166.23 nm | f=0.0144 | <S**2>=0.000 |
| 29 -> 34          | 0.69798      |           |           |          |              |
| Excited State 11: | Singlet-?Sym | 7.5795 eV | 163.58 nm | f=0.0069 | <S**2>=0.000 |
| 26 -> 30          | 0.66722      |           |           |          |              |
| 26 -> 31          | 0.11435      |           |           |          |              |
| Excited State 12: | Singlet-?Sym | 7.7173 eV | 160.66 nm | f=0.0140 | <S**2>=0.000 |
| 28 -> 33          | 0.69177      |           |           |          |              |
| Excited State 13: | Singlet-?Sym | 7.8830 eV | 157.28 nm | f=0.0157 | <S**2>=0.000 |
| 23 -> 30          | 0.15337      |           |           |          |              |
| 25 -> 30          | 0.68333      |           |           |          |              |
| Excited State 14: | Singlet-?Sym | 8.0948 eV | 153.17 nm | f=0.0237 | <S**2>=0.000 |
| 29 -> 35          | 0.69425      |           |           |          |              |
| Excited State 15: | Singlet-?Sym | 8.2287 eV | 150.67 nm | f=0.0125 | <S**2>=0.000 |
| 23 -> 30          | 0.15895      |           |           |          |              |
| 24 -> 30          | 0.64104      |           |           |          |              |
| 26 -> 31          | 0.19254      |           |           |          |              |
| Excited State 16: | Singlet-?Sym | 8.2473 eV | 150.33 nm | f=0.0180 | <S**2>=0.000 |
| 26 -> 31          | -0.35600     |           |           |          |              |
| 28 -> 34          | 0.57669      |           |           |          |              |
| Excited State 17: | Singlet-?Sym | 8.3524 eV | 148.44 nm | f=0.0263 | <S**2>=0.000 |
| 23 -> 30          | -0.14092     |           |           |          |              |
| 24 -> 31          | -0.11974     |           |           |          |              |
| 25 -> 31          | -0.18247     |           |           |          |              |
| 26 -> 31          | 0.39600      |           |           |          |              |
| 27 -> 32          | 0.15165      |           |           |          |              |
| 28 -> 34          | 0.36312      |           |           |          |              |
| 29 -> 36          | -0.25763     |           |           |          |              |
| Excited State 18: | Singlet-?Sym | 8.4561 eV | 146.62 nm | f=0.0170 | <S**2>=0.000 |
| 25 -> 31          | -0.10934     |           |           |          |              |

|                   |              |           |           |          |              |  |
|-------------------|--------------|-----------|-----------|----------|--------------|--|
|                   | 26 -> 31     | 0.10299   |           |          |              |  |
|                   | 27 -> 32     | 0.30861   |           |          |              |  |
|                   | 29 -> 36     | 0.60492   |           |          |              |  |
| Excited State 19: | Singlet-?Sym | 8.4834 eV | 146.15 nm | f=0.0094 | <S**2>=0.000 |  |
|                   | 25 -> 31     | 0.17976   |           |          |              |  |
|                   | 26 -> 31     | -0.17534  |           |          |              |  |
|                   | 27 -> 32     | 0.59878   |           |          |              |  |
|                   | 29 -> 36     | -0.21382  |           |          |              |  |
| Excited State 20: | Singlet-?Sym | 8.5258 eV | 145.42 nm | f=0.0356 | <S**2>=0.000 |  |
|                   | 23 -> 31     | 0.12073   |           |          |              |  |
|                   | 25 -> 31     | 0.61251   |           |          |              |  |
|                   | 26 -> 31     | 0.16295   |           |          |              |  |
|                   | 28 -> 34     | 0.11628   |           |          |              |  |
|                   | 29 -> 37     | -0.11087  |           |          |              |  |
| Excited State 21: | Singlet-?Sym | 8.6010 eV | 144.15 nm | f=0.0061 | <S**2>=0.000 |  |
|                   | 23 -> 30     | 0.12602   |           |          |              |  |
|                   | 25 -> 31     | 0.13504   |           |          |              |  |
|                   | 29 -> 37     | 0.67196   |           |          |              |  |
| Excited State 22: | Singlet-?Sym | 8.7264 eV | 142.08 nm | f=0.0031 | <S**2>=0.000 |  |
|                   | 22 -> 30     | 0.51551   |           |          |              |  |
|                   | 23 -> 31     | 0.13925   |           |          |              |  |
|                   | 24 -> 31     | 0.29390   |           |          |              |  |
|                   | 29 -> 38     | 0.33743   |           |          |              |  |
| Excited State 23: | Singlet-?Sym | 8.7325 eV | 141.98 nm | f=0.0053 | <S**2>=0.000 |  |
|                   | 22 -> 30     | 0.42358   |           |          |              |  |
|                   | 23 -> 30     | -0.20130  |           |          |              |  |
|                   | 23 -> 31     | 0.10319   |           |          |              |  |
|                   | 24 -> 31     | -0.35176  |           |          |              |  |
|                   | 29 -> 38     | -0.35404  |           |          |              |  |
| Excited State 24: | Singlet-?Sym | 8.8179 eV | 140.61 nm | f=0.0053 | <S**2>=0.000 |  |
|                   | 22 -> 30     | -0.17188  |           |          |              |  |
|                   | 23 -> 30     | -0.27415  |           |          |              |  |
|                   | 23 -> 31     | 0.48276   |           |          |              |  |
|                   | 24 -> 31     | 0.31206   |           |          |              |  |

|                   |              |           |           |          |              |  |
|-------------------|--------------|-----------|-----------|----------|--------------|--|
|                   | 29 -> 38     | -0.18400  |           |          |              |  |
| Excited State 25: | Singlet-?Sym | 8.8836 eV | 139.57 nm | f=0.0061 | <S**2>=0.000 |  |
|                   | 27 -> 33     | 0.68514   |           |          |              |  |
| Excited State 26: | Singlet-?Sym | 8.9006 eV | 139.30 nm | f=0.0140 | <S**2>=0.000 |  |
|                   | 23 -> 30     | 0.11709   |           |          |              |  |
|                   | 24 -> 31     | 0.25737   |           |          |              |  |
|                   | 28 -> 35     | 0.58158   |           |          |              |  |
|                   | 29 -> 38     | -0.19951  |           |          |              |  |
| Excited State 27: | Singlet-?Sym | 8.9591 eV | 138.39 nm | f=0.0864 | <S**2>=0.000 |  |
|                   | 23 -> 30     | -0.14732  |           |          |              |  |
|                   | 23 -> 31     | 0.16039   |           |          |              |  |
|                   | 24 -> 31     | -0.22232  |           |          |              |  |
|                   | 26 -> 31     | -0.16511  |           |          |              |  |
|                   | 27 -> 33     | 0.15729   |           |          |              |  |
|                   | 28 -> 35     | 0.36690   |           |          |              |  |
|                   | 28 -> 36     | -0.11986  |           |          |              |  |
|                   | 29 -> 38     | 0.36096   |           |          |              |  |
|                   | 29 -> 40     | 0.10423   |           |          |              |  |
| Excited State 28: | Singlet-?Sym | 9.1145 eV | 136.03 nm | f=0.0152 | <S**2>=0.000 |  |
|                   | 23 -> 30     | -0.15324  |           |          |              |  |
|                   | 23 -> 31     | -0.18493  |           |          |              |  |
|                   | 29 -> 39     | 0.63603   |           |          |              |  |
| Excited State 29: | Singlet-?Sym | 9.2783 eV | 133.63 nm | f=0.0308 | <S**2>=0.000 |  |
|                   | 22 -> 31     | -0.15173  |           |          |              |  |
|                   | 23 -> 30     | 0.18403   |           |          |              |  |
|                   | 23 -> 31     | 0.20966   |           |          |              |  |
|                   | 28 -> 36     | 0.52741   |           |          |              |  |
|                   | 28 -> 37     | 0.13450   |           |          |              |  |
|                   | 28 -> 38     | 0.10984   |           |          |              |  |
|                   | 29 -> 39     | 0.19509   |           |          |              |  |
| Excited State 30: | Singlet-?Sym | 9.3475 eV | 132.64 nm | f=0.0685 | <S**2>=0.000 |  |
|                   | 20 -> 30     | 0.13658   |           |          |              |  |
|                   | 22 -> 31     | 0.40612   |           |          |              |  |
|                   | 23 -> 30     | -0.23105  |           |          |              |  |

|          |          |
|----------|----------|
| 23 -> 31 | -0.17110 |
| 28 -> 36 | 0.38753  |
| 29 -> 39 | -0.11022 |

**Table S4.** The vertical excitation energies and oscillator strengths for the thirty lowest energy triplet excited states of molecule bicyclo[4,1,0]hept-4-en-2-one at the TD-DFT/M06-L/6-311G(d,p).

**[4,1.0]-TDDFT- Triplet**

Excitation energies and oscillator strengths:

|               |    |            |           |            |          |              |
|---------------|----|------------|-----------|------------|----------|--------------|
| Excited State | 1: | 3.007-?Sym | 1.0687 eV | 1160.09 nm | f=0.0006 | <S**2>=2.011 |
|               |    | 30A -> 31A | 0.89338   |            |          |              |
|               |    | 28B -> 29B | -0.45040  |            |          |              |
| Excited State | 2: | 3.008-?Sym | 1.4790 eV | 838.31 nm  | f=0.0076 | <S**2>=2.011 |
|               |    | 30A -> 31A | 0.44229   |            |          |              |
|               |    | 27B -> 29B | -0.21672  |            |          |              |
|               |    | 28B -> 29B | 0.86958   |            |          |              |
| Excited State | 3: | 3.007-?Sym | 2.0528 eV | 603.99 nm  | f=0.0051 | <S**2>=2.011 |
|               |    | 24B -> 29B | -0.10985  |            |          |              |
|               |    | 27B -> 29B | 0.96781   |            |          |              |
|               |    | 28B -> 29B | 0.19891   |            |          |              |
| Excited State | 4: | 3.008-?Sym | 2.8508 eV | 434.92 nm  | f=0.0008 | <S**2>=2.012 |
|               |    | 30A -> 32A | 0.99880   |            |          |              |
| Excited State | 5: | 3.011-?Sym | 3.3320 eV | 372.10 nm  | f=0.0045 | <S**2>=2.017 |
|               |    | 30A -> 33A | 0.42205   |            |          |              |
|               |    | 24B -> 29B | 0.19415   |            |          |              |
|               |    | 25B -> 29B | 0.23378   |            |          |              |
|               |    | 26B -> 29B | 0.84265   |            |          |              |
| Excited State | 6: | 3.008-?Sym | 3.3973 eV | 364.95 nm  | f=0.0040 | <S**2>=2.012 |
|               |    | 30A -> 33A | 0.90453   |            |          |              |
|               |    | 25B -> 29B | -0.16273  |            |          |              |
|               |    | 26B -> 29B | -0.37428  |            |          |              |

|               |     |            |           |           |          |              |
|---------------|-----|------------|-----------|-----------|----------|--------------|
| Excited State | 7:  | 3.008-?Sym | 3.6161 eV | 342.87 nm | f=0.0562 | <S**2>=2.012 |
|               |     | 24B -> 29B | 0.41139   |           |          |              |
|               |     | 25B -> 29B | 0.82934   |           |          |              |
|               |     | 26B -> 29B | -0.34747  |           |          |              |
|               |     |            |           |           |          |              |
| Excited State | 8:  | 3.008-?Sym | 3.8645 eV | 320.83 nm | f=0.0044 | <S**2>=2.012 |
|               |     | 30A -> 34A | 0.99524   |           |          |              |
|               |     |            |           |           |          |              |
| Excited State | 9:  | 3.011-?Sym | 3.9957 eV | 310.29 nm | f=0.0039 | <S**2>=2.017 |
|               |     | 23B -> 29B | -0.51095  |           |          |              |
|               |     | 24B -> 29B | 0.74465   |           |          |              |
|               |     | 25B -> 29B | -0.40361  |           |          |              |
|               |     |            |           |           |          |              |
| Excited State | 10: | 3.596-?Sym | 4.1611 eV | 297.96 nm | f=0.0087 | <S**2>=2.982 |
|               |     | 29A -> 31A | 0.53417   |           |          |              |
|               |     | 23B -> 29B | 0.53816   |           |          |              |
|               |     | 24B -> 29B | 0.30731   |           |          |              |
|               |     | 25B -> 29B | -0.16240  |           |          |              |
|               |     | 28B -> 30B | 0.49481   |           |          |              |
|               |     |            |           |           |          |              |
| Excited State | 11: | 3.475-?Sym | 4.2012 eV | 295.12 nm | f=0.0033 | <S**2>=2.769 |
|               |     | 29A -> 31A | -0.45344  |           |          |              |
|               |     | 22B -> 29B | -0.12034  |           |          |              |
|               |     | 23B -> 29B | 0.64693   |           |          |              |
|               |     | 24B -> 29B | 0.30483   |           |          |              |
|               |     | 25B -> 29B | -0.14833  |           |          |              |
|               |     | 28B -> 30B | -0.43515  |           |          |              |
|               |     | 28B -> 31B | -0.11964  |           |          |              |
|               |     |            |           |           |          |              |
| Excited State | 12: | 3.009-?Sym | 4.4415 eV | 279.15 nm | f=0.0134 | <S**2>=2.013 |
|               |     | 30A -> 35A | 0.99094   |           |          |              |
|               |     |            |           |           |          |              |
| Excited State | 13: | 3.009-?Sym | 4.7282 eV | 262.23 nm | f=0.0117 | <S**2>=2.013 |
|               |     | 30A -> 36A | 0.16270   |           |          |              |
|               |     | 22B -> 29B | 0.96529   |           |          |              |
|               |     | 23B -> 29B | 0.10934   |           |          |              |
|               |     |            |           |           |          |              |
| Excited State | 14: | 3.008-?Sym | 4.8512 eV | 255.57 nm | f=0.0107 | <S**2>=2.012 |
|               |     | 30A -> 36A | 0.98191   |           |          |              |

|                   |            |           |           |          |              |  |
|-------------------|------------|-----------|-----------|----------|--------------|--|
|                   | 22B -> 29B | -0.14455  |           |          |              |  |
| Excited State 15: | 3.009-?Sym | 4.9363 eV | 251.17 nm | f=0.0086 | <S**2>=2.013 |  |
|                   | 30A -> 37A | 0.98574   |           |          |              |  |
|                   | 30A -> 38A | 0.13446   |           |          |              |  |
| Excited State 16: | 3.010-?Sym | 5.0827 eV | 243.94 nm | f=0.0163 | <S**2>=2.015 |  |
|                   | 30A -> 37A | -0.11842  |           |          |              |  |
|                   | 30A -> 38A | 0.96632   |           |          |              |  |
|                   | 21B -> 29B | -0.15899  |           |          |              |  |
| Excited State 17: | 3.007-?Sym | 5.2012 eV | 238.38 nm | f=0.0009 | <S**2>=2.011 |  |
|                   | 30A -> 38A | 0.14263   |           |          |              |  |
|                   | 21B -> 29B | 0.97696   |           |          |              |  |
| Excited State 18: | 3.010-?Sym | 5.4676 eV | 226.76 nm | f=0.0091 | <S**2>=2.015 |  |
|                   | 30A -> 39A | 0.98189   |           |          |              |  |
| Excited State 19: | 3.010-?Sym | 5.7881 eV | 214.21 nm | f=0.0007 | <S**2>=2.016 |  |
|                   | 30A -> 40A | 0.15006   |           |          |              |  |
|                   | 20B -> 29B | 0.98510   |           |          |              |  |
| Excited State 20: | 3.015-?Sym | 5.9458 eV | 208.52 nm | f=0.0092 | <S**2>=2.023 |  |
|                   | 30A -> 40A | 0.94777   |           |          |              |  |
|                   | 20B -> 29B | -0.13319  |           |          |              |  |
|                   | 27B -> 30B | -0.10294  |           |          |              |  |
|                   | 28B -> 31B | -0.21858  |           |          |              |  |
| Excited State 21: | 3.033-?Sym | 6.1173 eV | 202.68 nm | f=0.0338 | <S**2>=2.050 |  |
|                   | 28A -> 31A | -0.15925  |           |          |              |  |
|                   | 29A -> 31A | 0.34930   |           |          |              |  |
|                   | 30A -> 40A | 0.19372   |           |          |              |  |
|                   | 18B -> 29B | -0.13696  |           |          |              |  |
|                   | 27B -> 30B | 0.11375   |           |          |              |  |
|                   | 28B -> 30B | -0.51657  |           |          |              |  |
|                   | 28B -> 31B | 0.69110   |           |          |              |  |
| Excited State 22: | 3.262-?Sym | 6.3246 eV | 196.04 nm | f=0.0164 | <S**2>=2.411 |  |
|                   | 28A -> 31A | 0.55120   |           |          |              |  |



|                   |            |           |           |          |              |  |
|-------------------|------------|-----------|-----------|----------|--------------|--|
|                   | 29A -> 31A | -0.38092  |           |          |              |  |
|                   | 18B -> 29B | 0.11611   |           |          |              |  |
|                   | 19B -> 29B | 0.22766   |           |          |              |  |
|                   | 27B -> 30B | -0.32553  |           |          |              |  |
|                   | 28B -> 30B | 0.19515   |           |          |              |  |
|                   | 28B -> 31B | 0.55528   |           |          |              |  |
| Excited State 23: | 3.060-?Sym | 6.5136 eV | 190.35 nm | f=0.0048 | <S**2>=2.092 |  |
|                   | 28A -> 31A | -0.26705  |           |          |              |  |
|                   | 19B -> 29B | 0.94205   |           |          |              |  |
|                   | 27B -> 30B | 0.16670   |           |          |              |  |
| Excited State 24: | 3.426-?Sym | 6.5752 eV | 188.56 nm | f=0.0035 | <S**2>=2.684 |  |
|                   | 27A -> 31A | 0.17524   |           |          |              |  |
|                   | 28A -> 31A | 0.54703   |           |          |              |  |
|                   | 27B -> 30B | 0.77684   |           |          |              |  |
|                   | 28B -> 30B | -0.12902  |           |          |              |  |
|                   | 28B -> 31B | -0.10744  |           |          |              |  |
| Excited State 25: | 3.012-?Sym | 6.7126 eV | 184.70 nm | f=0.0042 | <S**2>=2.018 |  |
|                   | 30A -> 41A | 0.96052   |           |          |              |  |
|                   | 30A -> 42A | 0.19573   |           |          |              |  |
|                   | 18B -> 29B | -0.12681  |           |          |              |  |
| Excited State 26: | 3.478-?Sym | 6.7639 eV | 183.30 nm | f=0.0481 | <S**2>=2.773 |  |
|                   | 27A -> 31A | -0.40045  |           |          |              |  |
|                   | 28A -> 31A | 0.46788   |           |          |              |  |
|                   | 29A -> 31A | 0.29520   |           |          |              |  |
|                   | 17B -> 29B | 0.12299   |           |          |              |  |
|                   | 18B -> 29B | -0.37062  |           |          |              |  |
|                   | 19B -> 29B | 0.19675   |           |          |              |  |
|                   | 27B -> 30B | -0.30591  |           |          |              |  |
|                   | 27B -> 31B | -0.24050  |           |          |              |  |
|                   | 28B -> 30B | -0.26697  |           |          |              |  |
|                   | 28B -> 31B | -0.26747  |           |          |              |  |
| Excited State 27: | 3.128-?Sym | 6.8904 eV | 179.94 nm | f=0.0155 | <S**2>=2.196 |  |
|                   | 27A -> 31A | -0.51389  |           |          |              |  |
|                   | 30A -> 42A | 0.59075   |           |          |              |  |
|                   | 18B -> 29B | 0.58139   |           |          |              |  |

|                   |            |           |           |          |              |  |
|-------------------|------------|-----------|-----------|----------|--------------|--|
|                   | 27B -> 30B | 0.10972   |           |          |              |  |
| Excited State 28: | 3.048-?Sym | 6.9125 eV | 179.36 nm | f=0.0100 | <S**2>=2.072 |  |
|                   | 27A -> 31A | 0.39569   |           |          |              |  |
|                   | 30A -> 41A | -0.19328  |           |          |              |  |
|                   | 30A -> 42A | 0.76898   |           |          |              |  |
|                   | 18B -> 29B | -0.40288  |           |          |              |  |
|                   | 27B -> 30B | -0.13250  |           |          |              |  |
|                   | 27B -> 31B | -0.11538  |           |          |              |  |
| Excited State 29: | 3.160-?Sym | 7.0603 eV | 175.61 nm | f=0.1031 | <S**2>=2.246 |  |
|                   | 27A -> 31A | 0.58102   |           |          |              |  |
|                   | 28A -> 31A | 0.15550   |           |          |              |  |
|                   | 29A -> 31A | 0.21475   |           |          |              |  |
|                   | 17B -> 29B | 0.22362   |           |          |              |  |
|                   | 18B -> 29B | 0.46517   |           |          |              |  |
|                   | 26B -> 30B | 0.22603   |           |          |              |  |
|                   | 27B -> 30B | -0.26674  |           |          |              |  |
|                   | 28B -> 30B | -0.28905  |           |          |              |  |
|                   | 28B -> 31B | -0.15441  |           |          |              |  |
|                   | 28B -> 32B | 0.15018   |           |          |              |  |
| Excited State 30: | 3.693-?Sym | 7.1014 eV | 174.59 nm | f=0.0002 | <S**2>=3.159 |  |
|                   | 29A -> 32A | 0.74428   |           |          |              |  |
|                   | 17B -> 29B | 0.43367   |           |          |              |  |
|                   | 27B -> 31B | 0.17195   |           |          |              |  |
|                   | 28B -> 32B | -0.46377  |           |          |              |  |

---

**(All were calculated at the M06-L/6-311G(d,p) level of theory)**

1. [2.1.0]-Rea-S<sub>0</sub>

| Atomic<br>Number | Coordinates (Angstroms) |           |           |
|------------------|-------------------------|-----------|-----------|
|                  | X                       | Y         | Z         |
| 1                | 0.062254                | 1.728094  | 1.083829  |
| 6                | 0.161597                | 1.242023  | 0.108664  |
| 6                | 0.881459                | -0.115814 | 0.036502  |
| 6                | -0.344999               | -0.834721 | -0.395490 |
| 6                | -1.492238               | -0.502530 | 0.536245  |
| 6                | -1.073214               | 0.530232  | -0.428228 |
| 1                | 0.628889                | 1.941831  | -0.588492 |
| 1                | -0.401576               | -1.680277 | -1.071300 |
| 1                | -1.303993               | -0.364836 | 1.597873  |
| 1                | -2.402550               | -1.046996 | 0.312783  |
| 1                | -1.705884               | 0.883826  | -1.231870 |
| 8                | 2.040905                | -0.422097 | 0.093878  |

M06L/6-311G\*\*=-269.3424228

2. [2.1.0]-Min-T<sub>1</sub>

| Atomic<br>Number | Coordinates (Angstroms) |           |           |
|------------------|-------------------------|-----------|-----------|
|                  | X                       | Y         | Z         |
| 1                | 0.404225                | 1.476075  | 1.224908  |
| 6                | 0.157721                | 1.264171  | 0.179857  |
| 6                | 0.936353                | 0.016914  | -0.437500 |
| 6                | -0.435182               | -0.622715 | -0.688091 |
| 6                | -1.204716               | -0.750949 | 0.590784  |
| 6                | -1.150666               | 0.570795  | -0.105252 |
| 1                | 0.361893                | 2.135860  | -0.446452 |
| 1                | -0.650503               | -1.189891 | -1.588155 |
| 1                | -0.672442               | -0.903480 | 1.525617  |
| 1                | -2.144199               | -1.288269 | 0.509310  |

|   |           |           |           |
|---|-----------|-----------|-----------|
| 1 | -2.035955 | 1.061147  | -0.492817 |
| 8 | 1.864491  | -0.520092 | 0.253600  |

-----  
M06L/6-311G\*\*=-269.2186183

3. [2.1.0]-TS1-T<sub>1</sub>

| Atomic<br>Number | Coordinates (Angstroms) |           |           |
|------------------|-------------------------|-----------|-----------|
|                  | X                       | Y         | Z         |
| 1                | 0.135389                | 1.647081  | 1.154366  |
| 6                | 0.069286                | 1.311548  | 0.111267  |
| 6                | 0.878716                | 0.093590  | -0.256813 |
| 6                | -0.202979               | -0.881627 | -0.462114 |
| 6                | -1.338427               | -0.717851 | 0.477631  |
| 6                | -1.217943               | 0.590980  | -0.209286 |
| 1                | 0.261224                | 2.171589  | -0.535518 |
| 1                | -0.067409               | -1.782207 | -1.068145 |
| 1                | -1.119051               | -0.738522 | 1.551269  |
| 1                | -2.233199               | -1.288134 | 0.235226  |
| 1                | -1.911138               | 0.888153  | -0.989062 |
| 8                | 1.975284                | -0.409724 | 0.210970  |

-----  
M06L/6-311G\*\*=-269.2087198

4. [2.1.0]-T<sub>1</sub>/S<sub>0</sub>

| Atomic<br>Number | Coordinates (Angstroms) |            |            |
|------------------|-------------------------|------------|------------|
|                  | X                       | Y          | Z          |
| 1                | 0.2668176               | 1.4694264  | 1.2193941  |
| 6                | 0.0405242               | 1.2649508  | 0.1615781  |
| 6                | 0.8508264               | -0.0099529 | -0.2533808 |
| 6                | -0.0554368              | -1.1082314 | -0.1847237 |
| 6                | -1.4015880              | -0.6743360 | 0.3250196  |
| 6                | -1.3176383              | 0.7628839  | -0.0717725 |
| 1                | 0.3340924               | 2.1399063  | -0.4201569 |
| 1                | 0.2125592               | -2.1234334 | -0.4603893 |

|   |            |            |            |
|---|------------|------------|------------|
| 1 | -1.4979768 | -0.8145246 | 1.4172355  |
| 1 | -2.2330755 | -1.2191000 | -0.1324541 |
| 1 | -1.9962194 | 1.1980349  | -0.7980319 |
| 8 | 2.0268680  | -0.0007479 | -0.5825273 |

Difference Gradient:

|     |             |             |             |
|-----|-------------|-------------|-------------|
| -1  | -0.00298545 | 0.00078381  | 0.00118264  |
| -2  | 0.03568009  | -0.04733247 | -0.04149544 |
| -3  | 0.03601199  | 0.09802474  | 0.01019743  |
| -4  | -0.02167526 | -0.08749204 | 0.04307891  |
| -5  | 0.03076184  | 0.00665262  | -0.08791323 |
| -6  | -0.10440334 | 0.06606497  | 0.05833341  |
| -7  | 0.00294934  | -0.00241112 | 0.00136648  |
| -8  | 0.00822724  | -0.00284590 | 0.00871035  |
| -9  | 0.01123299  | -0.00158419 | -0.00234907 |
| -10 | 0.00200323  | -0.00169255 | 0.00315180  |
| -11 | -0.00255486 | -0.00013213 | 0.00927861  |
| -12 | 0.00475218  | -0.02803574 | -0.00354188 |

-----  
M06L/6-311G\*\*=-269.2787403670

5. [2.1.0]-Int1-S<sub>0</sub>

| -----            |                         |           |           |  |
|------------------|-------------------------|-----------|-----------|--|
| Atomic<br>Number | Coordinates (Angstroms) |           |           |  |
|                  | X                       | Y         | Z         |  |
| -----            |                         |           |           |  |
| 1                | 0.236290                | 1.437508  | 1.165194  |  |
| 6                | -0.021125               | 1.204107  | 0.103818  |  |
| 6                | 0.890790                | -0.109843 | -0.019957 |  |
| 6                | -0.008839               | -1.184879 | 0.108485  |  |
| 6                | -1.391125               | -0.712303 | -0.020862 |  |
| 6                | -1.384000               | 0.757100  | -0.015683 |  |
| 1                | 0.241107                | 2.107317  | -0.479911 |  |
| 1                | 0.282536                | -2.228183 | 0.094232  |  |
| 1                | -2.114996               | -1.208733 | 0.661548  |  |
| 1                | -1.866772               | -0.918613 | -1.016711 |  |
| 1                | -2.184602               | 1.341539  | -0.466948 |  |
| 8                | 2.111529                | -0.031990 | -0.111526 |  |

-----  
M06L/6-311G\*\*=-269.2695437

6. [2.1.0]-TS2-S<sub>0</sub>

| Atomic<br>Number | Coordinates (Angstroms) |           |           |
|------------------|-------------------------|-----------|-----------|
|                  | X                       | Y         | Z         |
| 1                | 0.227106                | 1.993868  | 0.638523  |
| 6                | -0.053963               | 1.186816  | -0.042863 |
| 6                | 0.886665                | -0.058376 | -0.009404 |
| 6                | 0.016088                | -1.192591 | -0.137586 |
| 6                | -1.375400               | -0.720505 | -0.017060 |
| 6                | -1.439686               | 0.695550  | 0.020283  |
| 1                | 0.101396                | 1.589229  | -1.059433 |
| 1                | 0.302905                | -2.227683 | -0.016540 |
| 1                | -1.089295               | -0.768872 | 1.091166  |
| 1                | -2.241063               | -1.358077 | -0.170365 |
| 1                | -2.343826               | 1.280662  | 0.108261  |
| 8                | 2.105070                | 0.003188  | 0.066020  |

M06L/6-311G\*\*=-269.2685487

7. [2.1.0]-Int2-S<sub>0</sub>

| Atomic<br>Number | Coordinates (Angstroms) |           |           |
|------------------|-------------------------|-----------|-----------|
|                  | X                       | Y         | Z         |
| 1                | 0.179843                | -1.862466 | -0.870957 |
| 6                | -0.045290               | -1.235296 | 0.000255  |
| 6                | 0.854064                | -0.000185 | -0.000181 |
| 6                | -0.045188               | 1.235341  | 0.000126  |
| 6                | -1.426922               | 0.667511  | 0.000274  |
| 6                | -1.426902               | -0.667406 | -0.000412 |
| 1                | 0.178789                | -1.860146 | 0.873596  |
| 1                | -2.319062               | 1.284007  | -0.000208 |
| 1                | -2.318951               | -1.283818 | -0.001039 |
| 8                | 2.057652                | -0.000000 | -0.000199 |
| 1                | 0.180208                | 1.861516  | 0.872096  |
| 1                | 0.179379                | 1.861114  | -0.872269 |

-----  
M06L/6-311G\*\*=-269.3741087

8. [2.1.0]-TS3-S<sub>0</sub>

-----

| Atomic<br>Number | Coordinates (Angstroms) |           |           |
|------------------|-------------------------|-----------|-----------|
|                  | X                       | Y         | Z         |
| 1                | 0.233956                | -1.762333 | 1.094491  |
| 6                | 0.237781                | -1.240933 | 0.127092  |
| 6                | -0.749776               | -0.120382 | 0.129923  |
| 6                | -0.121147               | 1.149693  | 0.122919  |
| 6                | 1.302005                | 0.851770  | -0.100053 |
| 6                | 1.519131                | -0.477439 | -0.106787 |
| 1                | -0.003470               | -1.992793 | -0.630280 |
| 1                | 2.072989                | 1.603077  | -0.226376 |
| 1                | 2.473943                | -0.967623 | -0.246345 |
| 8                | -1.997586               | -0.104241 | -0.170000 |
| 1                | -0.452047               | 1.917561  | 0.820220  |
| 1                | -1.472641               | 1.059787  | -0.490275 |

-----

M06L/6-311G\*\*=-269.2575784

9. [2.1.0]-Pro-S<sub>0</sub>

-----

| Atomic<br>Number | Coordinates (Angstroms) |           |           |
|------------------|-------------------------|-----------|-----------|
|                  | X                       | Y         | Z         |
| 1                | 0.054665                | -1.794181 | -0.875336 |
| 6                | -0.148991               | -1.165078 | -0.000056 |
| 6                | 0.717608                | 0.049466  | -0.000096 |
| 6                | -0.041381               | 1.167897  | -0.000054 |
| 6                | -1.439470               | 0.752257  | -0.000050 |
| 6                | -1.531036               | -0.591024 | -0.000024 |
| 1                | 0.053918                | -1.793721 | 0.875729  |
| 1                | -2.272977               | 1.445065  | 0.000577  |
| 1                | -2.433559               | -1.185521 | -0.000068 |
| 8                | 2.059535                | -0.112771 | 0.000148  |

-----

|   |          |          |           |
|---|----------|----------|-----------|
| 1 | 0.312551 | 2.191660 | -0.000014 |
| 1 | 2.468750 | 0.757752 | -0.000389 |

-----  
M06L/6-311G\*\*=-269.3552506

10. [3.1.0]-Rea-S<sub>0</sub>

| Atomic<br>Number | Coordinates (Angstroms) |           |           |
|------------------|-------------------------|-----------|-----------|
|                  | X                       | Y         | Z         |
| 6                | -0.208121               | -0.915486 | -0.401950 |
| 6                | -1.343459               | 0.062417  | -0.436285 |
| 6                | -0.745748               | 1.370459  | -0.067747 |
| 6                | 0.566181                | 1.268540  | 0.189300  |
| 6                | 1.025785                | -0.121622 | -0.050348 |
| 1                | -0.122312               | -1.746757 | -1.089216 |
| 1                | -2.139306               | 0.001340  | -1.168943 |
| 1                | -1.340706               | 2.273430  | 0.026059  |
| 1                | 1.226684                | 2.053518  | 0.534274  |
| 8                | 2.159725                | -0.541915 | 0.005941  |
| 1                | -1.032545               | -0.623677 | 1.661534  |
| 6                | -1.278663               | -0.967146 | 0.661730  |
| 1                | -1.965460               | -1.805505 | 0.620562  |

-----  
M06L/6-311G\*\*=-307.4613456

11. [3.1.0]-Min-T<sub>1</sub>

| Atomic<br>Number | Coordinates (Angstroms) |           |           |
|------------------|-------------------------|-----------|-----------|
|                  | X                       | Y         | Z         |
| 6                | -0.171702               | -0.892845 | -0.438382 |
| 6                | -1.391826               | 0.074856  | -0.348246 |
| 6                | -0.864757               | 1.374937  | 0.016254  |
| 6                | 0.567884                | 1.264704  | 0.214467  |
| 6                | 1.019840                | -0.039944 | -0.105286 |
| 1                | -0.074162               | -1.647808 | -1.212867 |
| 1                | -2.221665               | -0.012685 | -1.040917 |



|   |           |           |           |
|---|-----------|-----------|-----------|
| 1 | -1.316883 | 2.296272  | -0.335663 |
| 1 | 1.221007  | 2.036153  | 0.605296  |
| 8 | 2.170551  | -0.513858 | 0.002194  |
| 1 | -0.935445 | -0.828653 | 1.650412  |
| 6 | -1.187718 | -1.083682 | 0.627491  |
| 1 | -1.867581 | -1.920571 | 0.518394  |

-----  
M06L/6-311G\*\*=-307.3620635

12. [3.1.0]-TS1-T<sub>1</sub>

| -----            |                         |           |           |
|------------------|-------------------------|-----------|-----------|
| Atomic<br>Number | Coordinates (Angstroms) |           |           |
|                  | X                       | Y         | Z         |
| -----            |                         |           |           |
| 6                | -0.043795               | -0.997082 | -0.374302 |
| 6                | -1.511906               | 0.099106  | -0.290257 |
| 6                | -0.910618               | 1.344465  | -0.067408 |
| 6                | 0.489084                | 1.239713  | 0.293483  |
| 6                | 1.044697                | -0.050532 | -0.048407 |
| 1                | -2.333301               | -0.005490 | -0.993714 |
| 1                | -1.279543               | 2.233923  | -0.573204 |
| 1                | 1.112322                | 2.061306  | 0.632543  |
| 8                | 2.239806                | -0.376405 | -0.052270 |
| 1                | -0.982421               | -0.883473 | 1.612205  |
| 6                | -1.184045               | -1.085485 | 0.562284  |
| 1                | -1.843840               | -1.935764 | 0.420830  |
| 1                | 0.107830                | -1.760374 | -1.132861 |

-----  
M06L/6-311G\*\*=-307.3561242

13. [3.1.0]-T<sub>1</sub>/S<sub>0</sub>

| -----            |                         |            |            |
|------------------|-------------------------|------------|------------|
| Atomic<br>Number | Coordinates (Angstroms) |            |            |
|                  | X                       | Y          | Z          |
| -----            |                         |            |            |
| 6                | 0.1039655               | -1.1767570 | -0.2199149 |
| 6                | -1.6284373              | 0.1712019  | -0.2729193 |
| 6                | -0.8481349              | 1.3413351  | -0.1113604 |

|   |            |            |            |
|---|------------|------------|------------|
| 6 | 0.4727571  | 1.2259968  | 0.2308854  |
| 6 | 1.0737323  | -0.0981495 | -0.0310443 |
| 1 | -2.4858862 | 0.1471980  | -0.9396488 |
| 1 | -1.3045058 | 2.3101814  | -0.3024225 |
| 1 | 1.1222204  | 2.0660553  | 0.4477604  |
| 8 | 2.2808615  | -0.2704587 | -0.1721451 |
| 1 | -1.1268972 | -0.8902423 | 1.5431197  |
| 6 | -1.2107473 | -1.0596133 | 0.4613617  |
| 1 | -1.8635090 | -1.9133424 | 0.2832330  |
| 1 | 0.3188507  | -1.9694973 | -0.9279830 |

Difference Gradient:

|     |             |             |             |
|-----|-------------|-------------|-------------|
| -1  | 0.07812556  | -0.03106805 | 0.04185071  |
| -2  | -0.06184664 | 0.10680229  | 0.04551076  |
| -3  | -0.08876106 | -0.03201168 | -0.02126604 |
| -4  | 0.03879369  | -0.04887777 | 0.01261781  |
| -5  | -0.02284862 | 0.00299075  | 0.00980108  |
| -6  | -0.01703988 | 0.01141926  | 0.02017030  |
| -7  | 0.00403556  | -0.00215477 | -0.01339830 |
| -8  | 0.00212659  | 0.00222937  | -0.00490843 |
| -9  | 0.03887593  | -0.00287987 | -0.00801049 |
| -10 | 0.00429792  | 0.00539612  | -0.00704953 |
| -11 | 0.01285784  | 0.00120994  | -0.08915680 |
| -12 | -0.00147968 | -0.00011963 | -0.00000779 |
| -13 | 0.01286278  | -0.01293595 | 0.01384672  |

-----  
M06L/6-311G\*\*=-307.3828399800

14. [3.1.0]-Int1-S<sub>0</sub>

| Atomic<br>Number | Coordinates (Angstroms) |           |           |
|------------------|-------------------------|-----------|-----------|
|                  | X                       | Y         | Z         |
| 6                | -0.326915               | -1.192373 | 0.026796  |
| 6                | 1.819725                | 0.117182  | -0.027644 |
| 6                | 1.065108                | 1.262100  | -0.000602 |
| 6                | -0.331116               | 1.205255  | 0.029520  |
| 6                | -1.142497               | -0.012225 | 0.006641  |
| 1                | -0.825449               | -2.158178 | 0.041304  |
| 1                | 2.902868                | 0.137357  | -0.055129 |

|   |           |           |           |
|---|-----------|-----------|-----------|
| 1 | 1.552524  | 2.233667  | -0.000583 |
| 1 | -0.894433 | 2.136228  | 0.048477  |
| 8 | -2.377800 | -0.007633 | -0.034065 |
| 1 | 1.499062  | -1.808735 | -0.824954 |
| 6 | 1.130160  | -1.169803 | -0.002636 |
| 1 | 1.501034  | -1.740091 | 0.870956  |

-----  
M06L/6-311G\*\*=-307.416002

15. [3.1.0]-TS2-S<sub>0</sub>

| -----            |                         |           |           |
|------------------|-------------------------|-----------|-----------|
| Atomic<br>Number | Coordinates (Angstroms) |           |           |
|                  | X                       | Y         | Z         |
| -----            |                         |           |           |
| 6                | 0.325463                | -1.193747 | -0.047467 |
| 6                | -1.828883               | 0.074329  | -0.056691 |
| 6                | -1.071530               | 1.238761  | -0.004821 |
| 6                | 0.312112                | 1.221779  | 0.032868  |
| 6                | 1.124963                | 0.016416  | 0.000136  |
| 1                | -2.911404               | 0.089665  | -0.077566 |
| 1                | -1.583213               | 2.197711  | 0.008954  |
| 1                | 0.859342                | 2.159324  | 0.074933  |
| 8                | 2.361435                | -0.003842 | -0.030648 |
| 6                | -1.132731               | -1.168997 | -0.016893 |
| 1                | -1.662255               | -2.085923 | -0.270774 |
| 1                | 0.830653                | -2.154305 | -0.018589 |
| 1                | -0.800959               | -1.306980 | 1.085438  |

-----  
M06L/6-311G\*\*=-307.4107885

16. [3.1.0]-Int2-S<sub>0</sub>

| -----            |                         |           |           |
|------------------|-------------------------|-----------|-----------|
| Atomic<br>Number | Coordinates (Angstroms) |           |           |
|                  | X                       | Y         | Z         |
| -----            |                         |           |           |
| 6                | 0.279294                | -1.265980 | 0.001931  |
| 6                | -1.812551               | 0.046069  | -0.001652 |
| 6                | -1.037365               | 1.268815  | -0.000007 |

|   |           |           |           |
|---|-----------|-----------|-----------|
| 6 | 0.313808  | 1.272703  | 0.002130  |
| 6 | 1.081738  | 0.029000  | 0.000321  |
| 1 | -2.895159 | 0.114759  | -0.002741 |
| 1 | -1.575688 | 2.213769  | -0.000543 |
| 1 | 0.884705  | 2.195483  | 0.002887  |
| 8 | 2.300614  | 0.006741  | -0.002553 |
| 6 | -1.202044 | -1.148972 | -0.000540 |
| 1 | -1.784397 | -2.066800 | -0.001060 |
| 1 | 0.612502  | -1.857809 | 0.864957  |
| 1 | 0.615849  | -1.863152 | -0.856175 |

-----  
M06L/6-311G\*\*=-307.477154

17. [3.1.0]-TS3-S<sub>0</sub>

| -----            |                         |           |           |
|------------------|-------------------------|-----------|-----------|
| Atomic<br>Number | Coordinates (Angstroms) |           |           |
|                  | X                       | Y         | Z         |
| -----            |                         |           |           |
| 6                | -0.380869               | 1.145572  | -0.183930 |
| 6                | 1.773357                | 0.126549  | 0.158928  |
| 6                | 1.171472                | -1.150038 | 0.000756  |
| 6                | -0.181864               | -1.334247 | -0.190906 |
| 6                | -0.975418               | -0.171178 | -0.103805 |
| 1                | 2.842202                | 0.185509  | 0.329548  |
| 1                | 1.809095                | -2.027884 | 0.071810  |
| 1                | -0.630930               | -2.319977 | -0.231651 |
| 8                | -2.205938               | -0.047498 | 0.252900  |
| 6                | 1.022204                | 1.268798  | 0.032159  |
| 1                | 1.495292                | 2.246555  | 0.038243  |
| 1                | -0.819901               | 1.786998  | -0.953214 |
| 1                | -1.621543               | 1.196051  | 0.442854  |

-----  
M06L/6-311G\*\*=-307.4175216

18. [3.1.0]-Pro-S<sub>0</sub>

| -----            |                         |   |   |
|------------------|-------------------------|---|---|
| Atomic<br>Number | Coordinates (Angstroms) |   |   |
|                  | X                       | Y | Z |

|   |           |           |           |
|---|-----------|-----------|-----------|
| 6 | -0.261423 | 1.195314  | 0.000543  |
| 6 | 1.850373  | 0.026243  | -0.000709 |
| 6 | 1.165263  | -1.186282 | 0.000045  |
| 6 | -0.221380 | -1.219136 | 0.000525  |
| 6 | -0.938927 | -0.023594 | 0.000498  |
| 1 | 2.934447  | 0.044187  | -0.000980 |
| 1 | 1.716782  | -2.121136 | -0.000053 |
| 1 | -0.767697 | -2.155715 | 0.000969  |
| 8 | -2.297670 | -0.109971 | -0.000721 |
| 6 | 1.128512  | 1.213880  | 0.000053  |
| 1 | 1.647175  | 2.167412  | 0.000185  |
| 1 | -0.824345 | 2.125779  | 0.000819  |
| 1 | -2.659510 | 0.780684  | -0.000898 |

M06L/6-311G\*\*=-307.5042095

19. [4.1.0]-Rea-S<sub>0</sub>

| Atomic<br>Number | Coordinates (Angstroms) |           |           |
|------------------|-------------------------|-----------|-----------|
|                  | X                       | Y         | Z         |
| 1                | 0.835747                | 1.234530  | 1.528083  |
| 6                | 0.755379                | 1.240814  | 0.429551  |
| 1                | 1.513911                | 1.955686  | 0.099743  |
| 6                | -0.623445               | 1.656577  | 0.018312  |
| 1                | -0.861605               | 2.715037  | 0.076036  |
| 6                | -1.545733               | 0.790306  | -0.401850 |
| 1                | -2.529890               | 1.142827  | -0.697452 |
| 6                | -1.310762               | -0.666638 | -0.442264 |
| 1                | -1.902991               | -1.240822 | -1.147173 |
| 6                | -0.929905               | -1.355405 | 0.829344  |
| 1                | -0.874703               | -0.743184 | 1.723269  |
| 1                | -1.253337               | -2.376059 | 0.993773  |
| 6                | 0.119155                | -1.146405 | -0.237650 |
| 1                | 0.442237                | -2.027558 | -0.779264 |
| 6                | 1.182702                | -0.130749 | -0.066039 |
| 8                | 2.343286                | -0.373932 | -0.321680 |

M06L/6-311G\*\*=-346.782817

20. [4.1.0]-Min-T<sub>1</sub>

| -----  |                         |           |           |
|--------|-------------------------|-----------|-----------|
| Atomic | Coordinates (Angstroms) |           |           |
| Number | X                       | Y         | Z         |
| -----  |                         |           |           |
| 1      | 0.750130                | 1.138664  | 1.482816  |
| 6      | 0.635840                | 1.305682  | 0.394739  |
| 1      | 1.288374                | 2.154287  | 0.163778  |
| 6      | -0.779241               | 1.601320  | 0.039323  |
| 1      | -1.091795               | 2.641791  | 0.022936  |
| 6      | -1.653030               | 0.642381  | -0.300404 |
| 1      | -2.670611               | 0.910568  | -0.571427 |
| 6      | -1.281828               | -0.773529 | -0.372521 |
| 1      | -1.903386               | -1.401757 | -1.002028 |
| 6      | -0.654812               | -1.446604 | 0.842824  |
| 1      | -0.575598               | -0.832549 | 1.733004  |
| 1      | -0.903123               | -2.486252 | 1.027002  |
| 6      | 0.201442                | -1.107220 | -0.335814 |
| 1      | 0.527857                | -1.940825 | -0.950630 |
| 6      | 1.121861                | 0.065152  | -0.345667 |
| 8      | 2.379595                | -0.238377 | -0.180041 |

-----  
M06L/6-311G\*\*=-346.6622779

21. [4.1.0]-TS1-T<sub>1</sub>

| -----  |                         |          |           |
|--------|-------------------------|----------|-----------|
| Atomic | Coordinates (Angstroms) |          |           |
| Number | X                       | Y        | Z         |
| -----  |                         |          |           |
| 1      | 0.927947                | 1.052462 | 1.692006  |
| 6      | 0.893363                | 1.113377 | 0.577912  |
| 1      | 1.750372                | 1.752805 | 0.311809  |
| 6      | -0.353921               | 1.695667 | 0.028458  |
| 1      | -0.374871               | 2.769857 | -0.152853 |
| 6      | -1.431462               | 0.953906 | -0.429545 |
| 1      | -2.233912               | 1.483646 | -0.944922 |

|   |           |           |           |
|---|-----------|-----------|-----------|
| 6 | -1.485030 | -0.463301 | -0.414541 |
| 1 | -2.179961 | -0.946758 | -1.095984 |
| 6 | -1.076003 | -1.287532 | 0.795209  |
| 1 | -1.016327 | -0.744947 | 1.734097  |
| 1 | -1.578665 | -2.246745 | 0.866850  |
| 6 | 0.028221  | -1.184988 | -0.178277 |
| 1 | 0.236589  | -2.063106 | -0.786649 |
| 6 | 1.119550  | -0.254757 | -0.043995 |
| 8 | 2.287565  | -0.561431 | -0.454459 |

-----  
M06L/6-311G\*\*=-346.6579847

22. [4.1.0]-T<sub>1</sub>/S<sub>0</sub>

| Atomic<br>Number | Coordinates (Angstroms) |            |            |
|------------------|-------------------------|------------|------------|
|                  | X                       | Y          | Z          |
| 1                | 0.6285213               | 0.8448700  | 1.6424200  |
| 6                | 0.8341454               | 1.0419096  | 0.5776624  |
| 1                | 1.6946571               | 1.7119373  | 0.5493299  |
| 6                | -0.3466661              | 1.6741943  | -0.0766943 |
| 1                | -0.2675557              | 2.7332602  | -0.3043045 |
| 6                | -1.4778374              | 1.0086018  | -0.5123736 |
| 1                | -2.1810606              | 1.5810573  | -1.1138337 |
| 6                | -1.8041297              | -0.3199751 | -0.2733720 |
| 1                | -2.6515718              | -0.7528653 | -0.7968518 |
| 6                | -1.0096701              | -1.2124888 | 0.6383228  |
| 1                | -0.9290149              | -0.7601684 | 1.6363016  |
| 1                | -1.5045996              | -2.1761268 | 0.7639303  |
| 6                | 0.3253617               | -1.3656177 | -0.0029207 |
| 1                | 0.5600261               | -2.2576759 | -0.5773724 |
| 6                | 1.2676386               | -0.2890280 | -0.0611351 |
| 8                | 2.3752105               | -0.3937294 | -0.5839930 |

Difference Gradient:

|    |            |             |             |
|----|------------|-------------|-------------|
| -1 | 0.00335360 | 0.00843624  | 0.00358247  |
| -2 | 0.00975039 | -0.01731834 | 0.03384982  |
| -3 | 0.00005750 | -0.00134780 | -0.00098101 |
| -4 | 0.01444017 | 0.00926585  | -0.01128894 |
| -5 | 0.00381615 | -0.00069756 | -0.00425583 |

|     |             |             |             |
|-----|-------------|-------------|-------------|
| -6  | -0.02412731 | -0.04008922 | -0.00352309 |
| -7  | -0.00055872 | -0.00012831 | -0.00052269 |
| -8  | -0.05978581 | 0.04633418  | 0.00035764  |
| -9  | -0.00775891 | 0.00352034  | 0.01453606  |
| -10 | 0.01803974  | -0.01047932 | -0.05104621 |
| -11 | 0.00668336  | 0.00421047  | -0.00451827 |
| -12 | 0.00087083  | -0.00117458 | -0.00132641 |
| -13 | 0.01769404  | -0.02417302 | 0.01193284  |
| -14 | 0.00934286  | -0.00837445 | 0.01088753  |
| -15 | 0.01502308  | 0.04721419  | 0.00828209  |
| -16 | -0.00684096 | -0.01519869 | -0.00596600 |

-----  
M06L/6-311G\*\*=-346.7129953550

23. [4.1.0]-Int1-S<sub>0</sub>

| Atomic<br>Number | Coordinates (Angstroms) |           |           |
|------------------|-------------------------|-----------|-----------|
|                  | X                       | Y         | Z         |
| 6                | -0.590130               | -0.995856 | 0.761426  |
| 6                | 0.344784                | -1.474312 | -0.224731 |
| 1                | 0.051284                | -2.308912 | -0.861315 |
| 6                | 1.635831                | -0.936080 | -0.345085 |
| 1                | 2.419533                | -1.573866 | -0.749805 |
| 6                | 1.946077                | 0.339519  | 0.017786  |
| 1                | 2.986485                | 0.641403  | 0.096832  |
| 6                | 0.938042                | 1.408401  | 0.188113  |
| 1                | 0.968531                | 1.691144  | 1.265551  |
| 1                | 1.343976                | 2.317012  | -0.279040 |
| 6                | -0.470460               | 1.280353  | -0.240499 |
| 1                | -0.971550               | 2.222975  | -0.448935 |
| 6                | -1.338174               | 0.199262  | -0.027214 |
| 8                | -2.514957               | 0.046752  | -0.310907 |
| 1                | -0.104795               | -0.588968 | 1.651451  |
| 1                | -1.369626               | -1.702526 | 1.033730  |

-----  
M06L/6-311G\*\*=-346.7175593

24. [4.1.0]-TS2-S<sub>0</sub>



| Atomic<br>Number | Coordinates (Angstroms) |           |           |
|------------------|-------------------------|-----------|-----------|
|                  | X                       | Y         | Z         |
| 6                | -0.588350               | -1.023050 | 0.716990  |
| 6                | 0.472103                | -1.521004 | -0.186246 |
| 1                | 0.303595                | -2.461859 | -0.702572 |
| 6                | 1.668438                | -0.877987 | -0.342295 |
| 1                | 2.487014                | -1.420732 | -0.811791 |
| 6                | 1.919950                | 0.450283  | 0.030411  |
| 1                | 2.946079                | 0.794652  | 0.106746  |
| 6                | 0.911524                | 1.440152  | 0.132569  |
| 1                | 0.277549                | 1.407008  | 1.117159  |
| 1                | 1.265326                | 2.469700  | 0.113543  |
| 6                | -0.523699               | 1.298747  | -0.201557 |
| 1                | -1.062246               | 2.231746  | -0.340104 |
| 6                | -1.327922               | 0.122949  | -0.009097 |
| 8                | -2.491972               | 0.009419  | -0.367207 |
| 1                | -0.146690               | -0.650297 | 1.651951  |
| 1                | -1.327114               | -1.786116 | 0.958069  |

M06L/6-311G\*\*=-346.7046071

25. [4.1.0]-Int2-S<sub>0</sub>

| Atomic<br>Number | Coordinates (Angstroms) |           |           |
|------------------|-------------------------|-----------|-----------|
|                  | X                       | Y         | Z         |
| 1                | 1.177137                | 2.054733  | -0.556916 |
| 6                | 0.519070                | 1.188355  | -0.484578 |
| 1                | 0.257578                | 0.889820  | -1.513267 |
| 6                | -0.742191               | 1.483761  | 0.254744  |
| 1                | -0.811991               | 2.455665  | 0.735912  |
| 6                | -1.807827               | 0.660948  | 0.285690  |
| 1                | -2.731041               | 1.016395  | 0.738733  |
| 6                | -1.803547               | -0.666184 | -0.291245 |
| 1                | -2.722749               | -1.025331 | -0.749539 |
| 6                | -0.735615               | -1.485600 | -0.252646 |

|   |           |           |           |
|---|-----------|-----------|-----------|
| 1 | -0.798645 | -2.457355 | -0.735126 |
| 6 | 0.521322  | -1.184166 | 0.492292  |
| 6 | 1.347785  | 0.001658  | 0.000776  |
| 8 | 2.550005  | 0.000626  | -0.004703 |
| 1 | 1.181513  | -2.048603 | 0.568739  |
| 1 | 0.254167  | -0.882966 | 1.518884  |

-----  
M06L/6-311G\*\*=-346.7873435

26. [4.1.0]-TS3-S<sub>0</sub>

| Atomic<br>Number | Coordinates (Angstroms) |           |           |
|------------------|-------------------------|-----------|-----------|
|                  | X                       | Y         | Z         |
| 1                | 1.019922                | -1.643379 | 1.196943  |
| 6                | 0.636758                | -1.198220 | 0.268667  |
| 1                | 2.063155                | -1.242145 | -0.051329 |
| 6                | -0.702492               | -1.601180 | -0.131625 |
| 1                | -0.844911               | -2.660700 | -0.340339 |
| 6                | -1.778684               | -0.789454 | -0.230324 |
| 1                | -2.721099               | -1.242160 | -0.529951 |
| 6                | -1.846068               | 0.599731  | 0.181298  |
| 1                | -2.827380               | 0.924497  | 0.528928  |
| 6                | -0.868871               | 1.521445  | 0.219753  |
| 1                | -1.107411               | 2.502616  | 0.622993  |
| 6                | 0.516237                | 1.355663  | -0.331858 |
| 6                | 1.196794                | 0.089529  | 0.035389  |
| 8                | 2.476493                | -0.006960 | 0.000986  |
| 1                | 1.187014                | 2.181805  | -0.063536 |
| 1                | 0.496720                | 1.370058  | -1.439408 |

-----  
M06L/6-311G\*\*=-346.6841309

27. [4.1.0]-Pro-S<sub>0</sub>

| Atomic<br>Number | Coordinates (Angstroms) |   |   |
|------------------|-------------------------|---|---|
|                  | X                       | Y | Z |

|   |           |           |           |
|---|-----------|-----------|-----------|
| 1 | 1.276684  | -1.831085 | 0.855843  |
| 6 | 0.520917  | -1.059749 | 0.701001  |
| 1 | 0.115530  | -0.775066 | 1.681695  |
| 6 | -0.586138 | -1.531383 | -0.192984 |
| 1 | -0.477721 | -2.495535 | -0.683102 |
| 6 | -1.704216 | -0.802606 | -0.377801 |
| 1 | -2.523051 | -1.251619 | -0.937424 |
| 6 | -1.895110 | 0.550411  | 0.064233  |
| 1 | -2.920149 | 0.891743  | 0.184084  |
| 6 | -0.909113 | 1.488572  | 0.167919  |
| 1 | -1.224418 | 2.511643  | 0.363118  |
| 6 | 0.487762  | 1.308420  | -0.085784 |
| 6 | 1.152217  | 0.134900  | 0.067652  |
| 8 | 2.444759  | -0.058808 | -0.291195 |
| 1 | 1.055144  | 2.180817  | -0.406895 |
| 1 | 2.741993  | 0.708171  | -0.793162 |

-----  
M06L/6-311G\*\*=-346.7765415

28. [5.1.0]-Rea-S<sub>0</sub>

| Atomic<br>Number | Coordinates (Angstroms) |           |           |
|------------------|-------------------------|-----------|-----------|
|                  | X                       | Y         | Z         |
| 6                | -1.811759               | -0.216780 | -0.240282 |
| 1                | -1.851636               | 0.191820  | -1.247573 |
| 6                | -1.198298               | -1.492619 | -0.055583 |
| 1                | -1.192358               | -1.893651 | 0.958234  |
| 6                | -0.001286               | -1.466501 | -0.744890 |
| 1                | -0.000802               | -0.962290 | -1.712864 |
| 6                | 1.115763                | -1.110292 | 0.145411  |
| 1                | 1.394637                | -1.807359 | 0.931094  |
| 6                | -0.173627               | 1.237103  | 0.235640  |
| 6                | -1.425561               | 0.620275  | 0.799713  |
| 1                | -1.254532               | 0.127956  | 1.759301  |
| 6                | 0.973900                | 0.390754  | 0.737033  |
| 1                | 1.161945                | 0.434929  | 1.805433  |
| 6                | 2.076064                | -0.020664 | -0.186485 |
| 1                | 3.082705                | -0.089265 | 0.211484  |

|   |           |          |           |
|---|-----------|----------|-----------|
| 1 | 2.021931  | 0.410553 | -1.182007 |
| 8 | -0.086633 | 1.992456 | -0.708305 |

-----  
M06L/6-311G\*\*=-384.7299843

29. [5.1.0]-Min-T<sub>1</sub>

| Atomic<br>Number | Coordinates (Angstroms) |           |           |
|------------------|-------------------------|-----------|-----------|
|                  | X                       | Y         | Z         |
| 6                | 1.108042                | -1.302993 | -0.358796 |
| 1                | 0.781746                | -1.358814 | -1.398529 |
| 6                | 2.172308                | -0.359783 | -0.047726 |
| 1                | 2.710351                | -0.430831 | 0.898234  |
| 6                | 1.484944                | 0.883129  | -0.439857 |
| 1                | 1.662405                | 1.290662  | -1.436723 |
| 6                | 0.322147                | 1.430237  | 0.322462  |
| 1                | 0.607621                | 2.122409  | 1.116996  |
| 6                | -1.091979               | -0.815416 | 0.190584  |
| 6                | 0.169102                | -1.478494 | 0.623169  |
| 1                | 0.485559                | -1.263149 | 1.645682  |
| 6                | -0.952761               | 0.635895  | 0.646761  |
| 1                | -1.385021               | 0.830477  | 1.625697  |
| 6                | -0.985509               | 1.738857  | -0.356094 |
| 1                | -1.503868               | 2.658752  | -0.109742 |
| 1                | -1.082723               | 1.435891  | -1.394723 |
| 8                | -1.954229               | -1.209249 | -0.553739 |

-----  
M06L/6-311G\*\*=-384.7074885

30. [5.1.0]-TS1-T<sub>1</sub>

| Atomic<br>Number | Coordinates (Angstroms) |           |           |
|------------------|-------------------------|-----------|-----------|
|                  | X                       | Y         | Z         |
| 6                | 0.315632                | -1.601282 | -0.071079 |
| 1                | 0.030470                | -1.696620 | -1.121308 |
| 6                | 1.703731                | -1.245450 | 0.151504  |

|   |           |           |           |
|---|-----------|-----------|-----------|
| 1 | 2.160085  | -1.323944 | 1.138778  |
| 6 | 1.838528  | -0.022818 | -0.669907 |
| 1 | 2.356732  | -0.086830 | -1.627571 |
| 6 | 1.077207  | 1.148255  | -0.456347 |
| 1 | 1.176844  | 1.925162  | -1.208380 |
| 6 | -1.482898 | -0.110698 | 0.046809  |
| 6 | -0.627518 | -1.111586 | 0.770960  |
| 1 | -0.329511 | -0.865151 | 1.789326  |
| 6 | -0.760993 | 1.179533  | -0.013346 |
| 1 | -1.244740 | 1.950438  | -0.605405 |
| 6 | 0.415651  | 1.574689  | 0.806422  |
| 1 | 0.640860  | 0.964259  | 1.675034  |
| 1 | 0.491667  | 2.635042  | 1.036936  |
| 8 | -2.519805 | -0.295776 | -0.558438 |

-----  
M06L/6-311G\*\*=-384.7020963

31. [5.1.0]-T<sub>1</sub>/S<sub>0</sub>

| Atomic<br>Number | Coordinates (Angstroms) |            |            |
|------------------|-------------------------|------------|------------|
|                  | X                       | Y          | Z          |
| 6                | 0.2762282               | -1.5290377 | -0.2024954 |
| 1                | -0.0306465              | -1.5350209 | -1.2463105 |
| 6                | 1.5753620               | -1.1233715 | 0.1210070  |
| 1                | 1.8338928               | -1.0842733 | 1.1796020  |
| 6                | 2.0151948               | -0.0021508 | -0.7277386 |
| 1                | 2.6171441               | -0.1541151 | -1.6215873 |
| 6                | 1.4672793               | 1.1943300  | -0.4492841 |
| 1                | 1.7089435               | 2.0307391  | -1.1005557 |
| 6                | -1.6285798              | -0.1185764 | 0.2383091  |
| 6                | -0.6319391              | -1.1287110 | 0.7530702  |
| 1                | -0.2978794              | -1.0789990 | 1.7897740  |
| 6                | -0.9688740              | 1.1348384  | 0.0995064  |
| 1                | -1.4386227              | 1.8359991  | -0.5877113 |
| 6                | 0.4094539               | 1.4883930  | 0.6141275  |
| 1                | 0.6330264               | 0.9578799  | 1.5428819  |
| 1                | 0.4486095               | 2.5530799  | 0.8603775  |
| 8                | -2.7466510              | -0.4237807 | -0.1789849 |

Difference Gradient:

|     |             |             |             |
|-----|-------------|-------------|-------------|
| -1  | -0.01587459 | 0.04374211  | 0.03006026  |
| -2  | 0.00062195  | 0.00131073  | -0.00260142 |
| -3  | 0.05191884  | -0.03642801 | -0.01482589 |
| -4  | 0.00299295  | -0.00011461 | -0.00185964 |
| -5  | -0.01981855 | 0.00799902  | 0.01669606  |
| -6  | 0.00985647  | 0.00694845  | 0.00606010  |
| -7  | 0.00784114  | 0.00875181  | -0.02562850 |
| -8  | 0.00338929  | 0.00409654  | 0.00046336  |
| -9  | -0.00776617 | -0.08780429 | 0.00311881  |
| -10 | -0.04278771 | -0.04239656 | 0.01338692  |
| -11 | -0.00004083 | 0.00841424  | -0.00373908 |
| -12 | 0.00558981  | 0.05640427  | -0.01331870 |
| -13 | -0.00678451 | 0.00985166  | 0.00808273  |
| -14 | 0.00352939  | -0.01203572 | -0.01170942 |
| -15 | -0.00145061 | -0.00349675 | -0.00307355 |
| -16 | -0.00397275 | 0.00110084  | -0.00366290 |
| -17 | 0.01275586  | 0.03365629  | 0.00255087  |

-----  
M06L/6-311G\*\*=-384.7251161560

32. [5.1.0]-Int1-S<sub>0</sub>

| Atomic<br>Number | Coordinates (Angstroms) |           |           |
|------------------|-------------------------|-----------|-----------|
|                  | X                       | Y         | Z         |
| 6                | 0.025355                | 1.793292  | 0.289697  |
| 1                | 0.018997                | 2.837837  | 0.608085  |
| 6                | 1.202348                | 1.432875  | -0.468427 |
| 1                | 1.655406                | 2.269916  | -1.003605 |
| 6                | 2.041130                | 0.335558  | -0.328146 |
| 1                | 3.074196                | 0.531464  | -0.620311 |
| 6                | 1.848923                | -0.932079 | 0.185504  |
| 1                | 2.739216                | -1.450085 | 0.541616  |
| 6                | -1.469372               | -0.234675 | -0.032348 |
| 6                | -1.021259               | 1.031531  | 0.647540  |
| 1                | -1.793984               | 1.463762  | 1.281495  |
| 6                | -0.697154               | -1.379814 | -0.252624 |
| 1                | -1.227625               | -2.170529 | -0.781274 |

|   |           |           |           |
|---|-----------|-----------|-----------|
| 6 | 0.615877  | -1.722935 | 0.304216  |
| 1 | 0.875201  | -2.760308 | 0.050839  |
| 1 | 0.519901  | -1.792656 | 1.419306  |
| 8 | -2.642048 | -0.108989 | -0.446078 |

-----  
M06L/6-311G\*\*=-384.7760896

33. [5.1.0]-TS2-S<sub>0</sub>

| Atomic<br>Number | Coordinates (Angstroms) |           |           |
|------------------|-------------------------|-----------|-----------|
|                  | X                       | Y         | Z         |
| 6                | 0.541008                | -1.313207 | -0.511913 |
| 1                | 0.197961                | -1.399799 | -1.545543 |
| 6                | 1.957542                | -1.005611 | -0.271510 |
| 1                | 2.770700                | -1.677935 | -0.539385 |
| 6                | 2.214615                | 0.212150  | 0.272296  |
| 1                | 3.229112                | 0.478265  | 0.567758  |
| 6                | 1.085333                | 1.112986  | 0.531276  |
| 1                | 0.760416                | 1.254606  | 1.562094  |
| 6                | -1.590583               | -0.254414 | 0.169843  |
| 6                | -0.339929               | -1.041355 | 0.465815  |
| 1                | 0.045541                | -0.989159 | 1.482444  |
| 6                | -1.238021               | 1.121552  | -0.267757 |
| 6                | 0.196705                | 1.491433  | -0.473490 |
| 1                | 0.565350                | 1.677816  | -1.486993 |
| 8                | -2.740872               | -0.647982 | 0.139050  |
| 1                | -2.021258               | 1.661549  | -0.793636 |
| 1                | -0.580866               | 2.237312  | 0.153496  |

-----  
M06L/6-311G\*\*=-384.7076543

34. [5.1.0]-Int2-S<sub>0</sub>

| Atomic<br>Number | Coordinates (Angstroms) |           |           |
|------------------|-------------------------|-----------|-----------|
|                  | X                       | Y         | Z         |
| 6                | 0.466474                | -1.425718 | -0.179773 |

|   |           |           |           |
|---|-----------|-----------|-----------|
| 1 | 0.081805  | -1.881103 | -1.094870 |
| 6 | 1.889625  | -1.064775 | -0.139486 |
| 1 | 2.648619  | -1.834010 | -0.272579 |
| 6 | 2.282177  | 0.230474  | -0.003990 |
| 1 | 3.346521  | 0.448636  | 0.072820  |
| 6 | 1.275119  | 1.278698  | 0.178204  |
| 1 | 1.294717  | 1.812312  | 1.131577  |
| 6 | -1.612874 | -0.230502 | 0.195878  |
| 6 | -0.405307 | -0.922038 | 0.718580  |
| 1 | 0.042607  | -0.418317 | 1.575143  |
| 6 | -1.224518 | 1.322239  | 0.014621  |
| 6 | 0.146502  | 1.283466  | -0.555875 |
| 1 | 0.200804  | 0.769824  | -1.518336 |
| 8 | -2.657432 | -0.659814 | -0.205372 |
| 1 | -2.005867 | 1.746578  | -0.618699 |
| 1 | -1.252939 | 1.803531  | 0.998970  |

-----  
M06L/6-311G\*\*=-384.8072147

35. [5.1.0]-TS3-S<sub>0</sub>

| Atomic<br>Number | Coordinates (Angstroms) |           |           |
|------------------|-------------------------|-----------|-----------|
|                  | X                       | Y         | Z         |
| 6                | -1.304798               | -0.378956 | -0.038486 |
| 6                | -1.006140               | 0.907480  | 0.682474  |
| 1                | -1.546988               | 1.034120  | 1.628695  |
| 6                | 0.013187                | 1.781778  | 0.332404  |
| 1                | -0.131216               | 2.822799  | 0.631642  |
| 6                | 1.172840                | 1.504220  | -0.412755 |
| 1                | 1.640554                | 2.362780  | -0.891672 |
| 6                | 1.951759                | 0.357827  | -0.371030 |
| 1                | 2.940820                | 0.503398  | -0.824103 |
| 6                | -0.620951               | -1.564629 | -0.121044 |
| 1                | -1.149084               | -2.412641 | -0.550380 |
| 6                | 0.708685                | -1.762722 | 0.299307  |
| 1                | 0.964139                | -2.789624 | 0.575905  |
| 6                | 1.804676                | -0.921106 | 0.213062  |
| 1                | 2.756168                | -1.398604 | 0.443279  |



|   |           |           |           |
|---|-----------|-----------|-----------|
| 8 | -2.464396 | -0.100757 | -0.551471 |
| 1 | -2.074775 | 1.140464  | -0.105200 |

-----  
M06L/6-311G\*\*=-384.7016182

36. [5.1.0]-Pro-S<sub>0</sub>

| Atomic<br>Number | Coordinates (Angstroms) |           |           |
|------------------|-------------------------|-----------|-----------|
|                  | X                       | Y         | Z         |
| 6                | 1.335641                | 0.180231  | -0.035537 |
| 6                | 0.867035                | -1.019038 | 0.673639  |
| 1                | 1.578680                | -1.420863 | 1.397444  |
| 6                | -0.271564               | -1.687693 | 0.462423  |
| 1                | -0.415509               | -2.615257 | 1.017975  |
| 6                | -1.341250               | -1.346558 | -0.474104 |
| 1                | -1.701043               | -2.168200 | -1.092930 |
| 6                | -1.993723               | -0.178418 | -0.543893 |
| 1                | -2.846664               | -0.128611 | -1.221470 |
| 6                | 0.702804                | 1.358976  | -0.146924 |
| 1                | 1.272330                | 2.167295  | -0.601792 |
| 6                | -0.605122               | 1.692565  | 0.397684  |
| 1                | -0.654657               | 2.644046  | 0.929249  |
| 6                | -1.762072               | 1.028345  | 0.245365  |
| 1                | -2.657063               | 1.482048  | 0.669492  |
| 8                | 2.618858                | 0.088213  | -0.510174 |
| 1                | 2.882561                | -0.836629 | -0.488489 |

-----  
M06L/6-311G\*\*=-384.8494029
